# Supplementary material for: Challenges Entailed in Applying Ecosystem Services Supply and Demand Mapping Approaches: A Practice Report
Source: MDPI journal article supplement (doi:10.3390/land12010052), 2022-12-24
Supplement: s1 [file s1]

Archive with 2 entries (2 files):
- Supplementary material_S1_V4.pdf
- Supplementary material_S2_V4.pdf
