# Supplementary material for: Challenges Entailed in Applying Ecosystem Services Supply and Demand Mapping Approaches: A Practice Report
Source: MDPI journal article supplement (doi:10.3390/land12010052), 2022-12-24
Supplement: s1 [file s1 › Supplementary material_S1_V4.pdf]

## Supplementary Materials S1

**Table S1.** Data used for the ES supply/demand mapping and assessments.

| Data                                              | Temporal resolution | Spatial resolution                                                                               | Source  |
|---------------------------------------------------|---------------------|--------------------------------------------------------------------------------------------------|---------|
| Administrative boundaries of Europe               | 2020                | 1:1 Mio                                                                                          | [1]     |
| Urban Atlas                                       | 2012                | Minimum Mapping Unit:<br>Class 1: 0.25 ha<br>Class 2 - 5: 1 ha<br>Minimum Mapping Width:<br>10 m | [2]     |
| Corine Land Cover                                 | 2012                | Minimum Mapping Unit:<br>10 ha / 25 ha                                                           | [3]     |
| Population density                                | 2011                | 100 m x 100 m grid                                                                               | [4,5]   |
| Tree cover density                                | 2015                | 20 m                                                                                             | [6]     |
| Potential evapotranspiration over grass           | 2019                | 1 km x 1 km                                                                                      | [7]     |
| Potential evapotranspiration                      | 2019                | Point data                                                                                       | [8]     |
| Temperature                                       | 2019                | Point data                                                                                       | [9]     |
| Nightly magnitude of the urban heat island effect | 2019                | 1 km x 1 km                                                                                      | [10]    |
| Flood hazard and flood risk                       | 2019                | Polygon and point data                                                                           | [11]    |
| ATKIS                                             | 2017                | 1:25.000                                                                                         | [12]    |
| Biotops                                           | 2015                | 1:10.000                                                                                         | [11]    |
| Run-off paths                                     | 2013                | Polylines                                                                                        | [13]    |
| Digital elevation model (DEM)                     | 2020                | 10 m x 10 m                                                                                      | [12]    |
| Crop coefficient ( $K_c$ )                        | -                   | Literature data                                                                                  | [14]    |
| Crop coefficient ( $K_c$ ) values for LULC        | -                   | Literature data                                                                                  | [15,16] |
| Albedo values for LULC                            | -                   | Literature data                                                                                  | [17]    |
| Building intensity values for LULC                | -                   | Literature data                                                                                  | [17]    |
| Nesting suitability and floral resources for LULC | -                   | Literature data                                                                                  | [18]    |

**Table S2.** Overview of the indicators, methods and categorisation used. If possible, indicators were mapped at a regional scale.

| Ecosystem services                                 | Component | Indicator (Unit)                                   | Method                                                                      | Tier | Data categorisation                                                                                                                             |
|----------------------------------------------------|-----------|----------------------------------------------------|-----------------------------------------------------------------------------|------|-------------------------------------------------------------------------------------------------------------------------------------------------|
| Food (from cultivated terrestrial plants)          | Supply    | Agricultural area (%)                              | Calculation of the percentage of agricultural area in a 10-ha x 10-ha grid. | 1    | 5 – very high: >80 - 100<br>4 – high: >60 - ≤80<br>3 – medium: >40 - ≤60<br>2 – low: >20 - ≤40<br>1 – very low: >0 - ≤20<br>0 – not relevant: 0 |
|                                                    | Demand    | Population density (Inhabitants ha <sup>-1</sup> ) | Spatial join of population density data with a 100-m x 100-m grid [4,5]     | 1    | 5 – very high: >100<br>4 – high: >75 - ≤100<br>3 – medium: >50 - ≤75<br>2 – low: >25 - ≤50<br>1 – very low: >0 - ≤25<br>0 – not relevant: 0     |
| Raw materials (from cultivated terrestrial plants) | Supply    | Forest area (%)                                    | Calculation of the percentage of forest area in a 10-ha x 10-ha grid.       | 1    | 5 – very high: >80 - 100<br>4 – high: >60 - ≤80<br>3 – medium: >40 - ≤60<br>2 – low: >20 - ≤40<br>1 – very low: >0 - ≤20<br>0 – not relevant: 0 |

| Ecosystem services       | Component | Indicator (Unit)                                           | Method                                                                                                                                                                                                       | Tier | Data categorisation                                                                                                                                  |
|--------------------------|-----------|------------------------------------------------------------|--------------------------------------------------------------------------------------------------------------------------------------------------------------------------------------------------------------|------|------------------------------------------------------------------------------------------------------------------------------------------------------|
| Pollination              | Demand    | Population density (Inhabitants ha <sup>-1</sup> )         | Spatial join of population density data with a 100-m x 100-m grid [4,5]                                                                                                                                      | 1    | 5 – very high: >100<br>4 – high: >75 - ≤100<br>3 – medium: >50 - ≤75<br>2 – low: >25 - ≤50<br>1 – very low: >0 - ≤25<br>0 – not relevant: 0          |
|                          | Supply    | Pollinator Abundance (Index 0 to 1, Dimensionless)         | Wild bee abundance has been modelled using InVEST "Pollinator Abundance: Crop Pollination" [19]                                                                                                              | 2-3  | 5 – very high: >0.8 - 1<br>4 – high: >0.6 - ≤0.8<br>3 – medium: >0.4 - ≤0.6<br>2 – low: >0.2 - ≤0.4<br>1 – very low: >0 - ≤0.2<br>0 – extreme low: 0 |
|                          | Demand    | Dependence of crops on pollination by insects (%)          | Dependence of crops on pollination by insects [18,20] was assigned to relevant LULC.                                                                                                                         | 1    | 5 – very high: >80 - 100<br>4 – high: >60 - ≤80<br>3 – medium: >40 - ≤60<br>2 – low: >20 - ≤40<br>1 – very low: >0 - ≤20<br>0 – extreme low: 0       |
| Local climate regulation | Supply    | Green and blue areas (%)                                   | Calculation of the percentage of green and blue area in a 10-ha x 10-ha grid.                                                                                                                                | 1    | 5 – very high: >80 - 100<br>4 – high: >60 - ≤80<br>3 – medium: >40 - ≤60<br>2 – low: >20 - ≤40<br>1 – very low: >0 - ≤20<br>0 – extreme low: 0       |
|                          | Supply    | f-evapotranspiration (f-ETP) (Index 0 to 1, dimensionless) | Value-transfer of literature data [21,22].                                                                                                                                                                   | 1    | 5 – very high: >0.8 - 1<br>4 – high: >0.6 - ≤0.8<br>3 – medium: >0.4 - ≤0.6<br>2 – low: >0.2 - ≤0.4<br>1 – very low: >0 - ≤0.2<br>0 – extreme low: 0 |
|                          | Demand    | Surface emissivity (Index 0 to 1, dimensionless)           | Value-transfer of literature data [21,22].                                                                                                                                                                   | 1    | 5 – very high: >0.8 - 1<br>4 – high: >0.6 - ≤0.8<br>3 – medium: >0.4 - ≤0.6<br>2 – low: >0.2 - ≤0.4<br>1 – very low: >0 - ≤0.2<br>0 – extreme low: 0 |
| Coastal protection       | Demand    | Coastal flood risk (Index 0 to 1, dimensionless)           | Calculation of the coastal flood risk for the assets (human health, the environment, infrastructure and human economic activities) by multiplying flood hazard with the potential damage of each asset [13]. | 1-2  | See explanations below.                                                                                                                              |

**Table S3.** Overview of the indicators used in the ES modelling. If possible, indicators were mapped at a regional scale.

| Ecosystem services | Component | Indicator (Unit)                                   | Method                                                                                          | Tier | Data categorisation                                                                                                            |
|--------------------|-----------|----------------------------------------------------|-------------------------------------------------------------------------------------------------|------|--------------------------------------------------------------------------------------------------------------------------------|
| Pollination        | Supply    | Pollinator Abundance (Index 0 to 1, Dimensionless) | Wild bee abundance has been modelled using InVEST "Pollinator Abundance: Crop Pollination" [19] | 2-3  | 5 – very high: >0.8 - 1<br>4 – high: >0.6 - ≤0.8<br>3 – medium: >0.4 - ≤0.6<br>2 – low: >0.2 - ≤0.4<br>1 – very low: >0 - ≤0.2 |

| Ecosystem services       | Component | Indicator (Unit)                              | Method                                                                           | Tier | Data categorisation     |
|--------------------------|-----------|-----------------------------------------------|----------------------------------------------------------------------------------|------|-------------------------|
| Local climate regulation | Supply    | Heat mitigation (Index 0 to 1, Dimensionless) | Heat mitigation index has been modelled using InVEST "Urban Cooling Model" [23]. | 2-3  | 0 – extreme low: 0      |
|                          |           |                                               |                                                                                  |      | 5 – very high: >0.8 - 1 |
|                          |           |                                               |                                                                                  |      | 4 – high: >0.6 - ≤0.8   |
|                          |           |                                               |                                                                                  |      | 3 – medium: >0.4 - ≤0.6 |
|                          |           |                                               |                                                                                  |      | 2 – low: >0.2 - ≤0.4    |
|                          |           |                                               |                                                                                  |      | 1 – very low: >0 - ≤0.2 |
|                          |           |                                               |                                                                                  |      | 0 – extreme low: 0      |

### 1. Food (from cultivated terrestrial plants)

LULC data can be used as proxies for ES supply [24]. We calculated the percentage of LULC types (Urban Atlas 2012), which are highly associated with producing food (arable land, permanent crops (vineyards, fruit trees, olive groves)) in geospatial units. The calculation of the percentage share can also be applied to official administrative units. Since these vary in size in the urban regions, we decided to use a uniform raster with a grid size of 10 ha. The demand for food has been mapped using population density data (inhabitants/ha) [4,5].

### 2. Raw materials (from cultivated terrestrial plants)

For ES supply, we calculated the percentage of LULC types, which are highly associated with providing timber (forest). We used a uniform raster with a grid size of 10 ha. The demand for food has been mapped using population density data (inhabitants/ha) [4,5].

### 3. Pollination

ES supply has been assessed using the indicator pollinator abundance [19], calculated with the InVEST Model *Pollinator Abundance: Crop Pollination*. This model considers that wild bees need suitable nesting sites and sufficient floral resources to survive. If these resources are available, the insects can fly to nearby plants and pollinate them. We used CLC 2012 and Urban Atlas 2012 and intersected them (see Table S4).

**Table S4.** Selected LULC classes from CORINE Land Cover (CLC) and Urban Atlas.

| CORINE Land Cover (CLC) |                                            | Urban Atlas |                                                             | Selected LULC classes for InVEST Models |             |
|-------------------------|--------------------------------------------|-------------|-------------------------------------------------------------|-----------------------------------------|-------------|
| Code                    | Label                                      | Code        | Label                                                       | CLC                                     | Urban Atlas |
| 111                     | Continuous urban fabric                    | 11100       | Continuous urban fabric (S.L.: > 80%)                       |                                         | x           |
| 112                     | Discontinuous urban fabric                 | 11210       | Discontinuous dense urban fabric (S.L.: 50% - 80%)          |                                         | x           |
| 112                     | Discontinuous urban fabric                 | 11230       | Discontinuous medium-density urban fabric (S.L.: 30% - 50%) |                                         | x           |
| 112                     | Discontinuous urban fabric                 | 11220       | Discontinuous low-density urban fabric (S.L.: 10% - 30%)    |                                         | x           |
| 112                     | Discontinuous urban fabric                 | 11240       | Discontinuous very low-density urban fabric (S.L.: < 10%)   |                                         | x           |
| 121                     | Industrial or commercial units             | 12100       | Industrial, commercial, public, military and private units  |                                         | x           |
| 122                     | Road and rail networks and associated land | 12210       | Fast transit roads and associated land                      |                                         | x           |
| 122                     | Road and rail networks and associated land | 12230       | Railways and associated land                                |                                         | x           |
| 122                     | Road and rail networks and associated land | 12220       | Other roads and associated land                             |                                         | x           |
| 123                     | Port areas                                 | 12300       | Port areas                                                  | x                                       |             |
| 124                     | Airports                                   | 12400       | Airports                                                    | x                                       |             |
| 131                     | Mineral extraction sites                   | 13100       | Mineral extraction and dump sites                           | x                                       |             |
| 132                     | Dump sites                                 | 13100       | Mineral extraction and dump sites                           | x                                       |             |
| 133                     | Construction sites                         | 13300       | Construction sites                                          | x                                       |             |
| 141                     | Green urban areas                          | 14100       | Green urban areas                                           |                                         | x           |

|     |                                                                                        |       |                                                                                 |   |   |
|-----|----------------------------------------------------------------------------------------|-------|---------------------------------------------------------------------------------|---|---|
| 142 | Sport and leisure facilities                                                           | 14200 | Sports and leisure facilities                                                   |   | x |
| 211 | Non-irrigated arable land                                                              | 21000 | Arable land (annual crops)                                                      | x |   |
| 212 | Permanently irrigated land                                                             | 21000 | Arable land (annual crops)                                                      | x |   |
| 213 | Rice fields                                                                            | 21000 | Arable land (annual crops)                                                      | x |   |
| 221 | Vineyards                                                                              | 22000 | Permanent crops (vineyards, fruit trees, olive groves)                          | x |   |
| 222 | Fruit trees and berry plantations                                                      | 22000 | Permanent crops (vineyards, fruit trees, olive groves)                          | x |   |
| 223 | Olive groves                                                                           | 22000 | Permanent crops (vineyards, fruit trees, olive groves)                          | x |   |
| 231 | Pastures                                                                               | 23000 | Pastures                                                                        | x |   |
| 241 | Annual crops associated with permanent crops                                           | 0     |                                                                                 | x |   |
| 242 | Complex cultivation patterns                                                           | 24000 | Complex and mixed cultivation patterns                                          |   | x |
| 243 | Land principally occupied by agriculture, with significant areas of natural vegetation | 25000 | Orchards                                                                        |   | x |
| 244 | Agro-forestry areas                                                                    | 0     |                                                                                 | x |   |
| 311 | Broad-leaved forest                                                                    | 31000 | Forests                                                                         | x |   |
| 312 | Coniferous forest                                                                      | 31000 | Forests                                                                         | x |   |
| 313 | Mixed forest                                                                           | 31000 | Forests                                                                         | x |   |
| 321 | Natural grasslands                                                                     | 32000 | Herbaceous vegetation associations (natural grassland, moors...)                | x |   |
| 322 | Moors and heathland                                                                    | 32000 | Herbaceous vegetation associations (natural grassland, moors...)                | x |   |
| 323 | Sclerophyllous vegetation                                                              | 32000 | Herbaceous vegetation associations (natural grassland, moors...)                | x |   |
| 324 | Transitional woodland-shrub                                                            | 32000 | Herbaceous vegetation associations (natural grassland, moors...)                | x |   |
| 331 | Beaches, dunes, sands                                                                  | 33000 | Open spaces with little or no vegetation (beaches, dunes, bare rocks, glaciers) | x |   |
| 332 | Bare rocks                                                                             | 33000 | Open spaces with little or no vegetation (beaches, dunes, bare rocks, glaciers) | x |   |
| 333 | Sparsely vegetated areas                                                               | 33000 | Open spaces with little or no vegetation (beaches, dunes, bare rocks, glaciers) | x |   |
| 334 | Burnt areas                                                                            | 33000 | Open spaces with little or no vegetation (beaches, dunes, bare rocks, glaciers) | x |   |
| 335 | Glaciers and perpetual snow                                                            | 33000 | Open spaces with little or no vegetation (beaches, dunes, bare rocks, glaciers) | x |   |
| 411 | Inland marshes                                                                         | 40000 | Wetlands                                                                        | x |   |
| 412 | Peat bogs                                                                              | 40000 | Wetlands                                                                        | x |   |
| 421 | Salt marshes                                                                           | 40000 | Wetlands                                                                        | x |   |
| 422 | Salines                                                                                | 40000 | Wetlands                                                                        | x |   |
| 423 | Intertidal flats                                                                       | 40000 | Wetlands                                                                        | x |   |
| 511 | Water courses                                                                          | 50000 | Water                                                                           |   | x |
| 512 | Water bodies                                                                           | 50000 | Water                                                                           |   | x |
| 521 | Coastal lagoons                                                                        | 50000 | Water                                                                           |   | x |
| 522 | Estuaries                                                                              | 50000 | Water                                                                           |   | x |
| 523 | Sea and ocean                                                                          | 50000 | Water                                                                           |   | x |
|     |                                                                                        | 11300 | Isolated Structures                                                             |   | x |
|     |                                                                                        | 13400 | Land without current use                                                        |   | x |

The data has been transferred into a raster (2.5 x 2.5 m resolution). The model needs a) a biophysical table with nesting suitability and floral resources across seasons for each LULC type (Table S5) and b) a guide table with information about wild bee species' active seasons, nesting preferences, mean flight distances, and relative abundances for each species or group of wild pollinators [19]. Information about twenty wild bee species (=average wild bee species) was combined for the guide table. For the biophysical table, values from Zulian et al. (2013) [18] were used and adapted for the Urban Atlas LULC (Table S6).

Table S5. Biophysical table, adapted from Zulian et al. (2013) [18]. Marked LULC (\*) shows adjusted values for the Urban Atlas dataset.

| lucode | Label                                                                                    | nesting_cavity_availability_index | nesting_ground_availability_index | floral_resources_index |
|--------|------------------------------------------------------------------------------------------|-----------------------------------|-----------------------------------|------------------------|
| 1      | Water bodies*                                                                            | 0                                 | 0                                 | 0                      |
| 2      | Sea and ocean                                                                            | 0                                 | 0                                 | 0                      |
| 3      | Peat bogs                                                                                | 0.3                               | 0.3                               | 0.5                    |
| 4      | Inland marshes                                                                           | 0.3                               | 0.3                               | 0.75                   |
| 5      | Beaches, dunes, sands                                                                    | 0.3                               | 0.3                               | 0.1                    |
| 6      | Transitional woodland-shrub                                                              | 1                                 | 1                                 | 0.85                   |
| 7      | Natural grasslands                                                                       | 0.8                               | 0.8                               | 1                      |
| 8      | Broad-leaved forest                                                                      | 0.8                               | 0.8                               | 0.9                    |
| 9      | Coniferous forest                                                                        | 0.8                               | 0.8                               | 0.3                    |
| 10     | Mixed forest                                                                             | 0.8                               | 0.8                               | 0.6                    |
| 11     | Fruit trees and berry plantations                                                        | 0.4                               | 0.4                               | 0.9                    |
| 12     | Pastures                                                                                 | 0.3                               | 0.3                               | 0.2                    |
| 13     | Complex cultivation patterns*                                                            | 0.4                               | 0.4                               | 0.4                    |
| 14     | Land principally occupied by agriculture, with significant areas of natural vegetation * | 0.7                               | 0.7                               | 0.75                   |
| 15     | Non-irrigated arable land                                                                | 0.2                               | 0.2                               | 0.2                    |
| 16     | Green urban areas*                                                                       | 0.3                               | 0.3                               | 0.25                   |
| 17     | Sports and leisure facilities*                                                           | 0.3                               | 0.3                               | 0.05                   |
| 18     | Land without current use*                                                                | 0                                 | 0                                 | 0                      |
| 19     | Mineral extraction sites                                                                 | 0.3                               | 0.3                               | 0.05                   |
| 20     | Dump sites                                                                               | 0.05                              | 0.05                              | 0                      |
| 21     | Construction sites                                                                       | 0.1                               | 0.1                               | 0                      |
| 22     | Fast transit roads and associated land                                                   | 0.3                               | 0.3                               | 0.25                   |
| 23     | Other roads and associated land                                                          | 0.3                               | 0.3                               | 0.25                   |
| 24     | Railways and associated land                                                             | 0.3                               | 0.3                               | 0.25                   |
| 25     | Port areas                                                                               | 0.3                               | 0.3                               | 0                      |
| 26     | Airports                                                                                 | 0.3                               | 0.3                               | 0.1                    |
| 27     | Continuous urban fabric (S.L.: > 80%)                                                    | 0.1                               | 0.1                               | 0.05                   |
| 28     | Discontinuous dense urban fabric (S.L.: 50% - 80%)                                       | 0.2                               | 0.2                               | 0.175                  |
| 29     | Discontinuous medium-density urban fabric (S.L.: 30% - 50%)                              | 0.3                               | 0.3                               | 0.3                    |
| 30     | Discontinuous low-density urban fabric (S.L.: 10% - 30%)                                 | 0.3                               | 0.3                               | 0.2875                 |
| 31     | Discontinuous very low-density urban fabric (S.L.: < 10%)                                | 0.3                               | 0.3                               | 0.2625                 |
| 32     | Isolated structures*                                                                     | 0                                 | 0                                 | 0                      |
| 33     | Industrial or commercial units *                                                         | 0.1                               | 0.1                               | 0.05                   |

Table S6. Guide table for the InVEST model *Pollinator Abundance: Crop Pollination*.

| SPECIES | nesting_suitability_index | foraging_activity_spring_index | alpha | relative |
|---------|---------------------------|--------------------------------|-------|----------|
|---------|---------------------------|--------------------------------|-------|----------|

|             |   |     | abundance |
|-------------|---|-----|-----------|
| average_bee | 1 | 0,5 | 600       |
|             |   |     | 1         |

The ES demand for pollination was assessed using the degree to which a crop is dependent on pollination by insects. This degree was first assessed by Klein et al. (2007) [20], who provided a list of important crops and their dependence on animal pollinators. These values are also used at the EU level to assess ES demand for pollination (Zulian et al. 2013) [18]. In an ideal situation, information on the pollination dependence of crops is linked to agricultural cultivation data to obtain explicit spatial information on ES demand. In Germany, these data are saved in an agricultural database (Integrated Administration and Control System, InVeKoS), which has restricted access for data protection reasons [25]. Therefore, we followed a methodological approach used by Schulp et al. 2014 [26] and Perennes et al. (2021) [27], who linked land use data on which potentially pollinator-dependent crops can grow with pollinator dependence values. We have assigned exemplary pollination dependencies to the LULC classes. For example, rapeseed is in Germany an important crop that is dependent on pollination by insects. The location of rapeseed fields usually changes annually due to crop rotations, varying market prices and changing political regulations and subsidies. Hence, the demand for pollination of rapeseed can potentially occur on all arable land [27]. Similar considerations took place in allocating crops for land-use "permanent crops (vineyards, fruit trees, olive groves)". We used the EUROSTAT dependence levels for these crop types as used in Zulian et al. (2013) [18] (Table S7).

Table S7. Pollination dependencies (%) of crops that could grow on selected LULC (adapted from Zulian et al. (2013) [18]).

| Land use and land cover           | Crop type               | Pollination dependence |
|-----------------------------------|-------------------------|------------------------|
| Arable land (annual crops)        | Rape seed               | 25 %                   |
| Fruit trees and berry plantations | Apples, pears & peaches | 65 %                   |

#### 4. Local climate regulation

Indicator *green and blue areas (%)*: We calculated the percentage of green and blue areas (forests, agricultural areas, wetlands, water bodies, urban green areas, cemeteries and other vegetation areas) in each grid cell (10 ha).

Indicator *f-evapotranspiration (f-ETP)*: Evapotranspiration (ETP) covers water evaporation from soil surfaces (evaporation) and vegetation (transpiration) [28]. In this process, heat energy is converted into latent heat of vaporisation, which can result in a noticeable cooling effect [21]. We used the *f-ETP* index as a proxy to assess the ES supply for local climate regulation. Schwarz et al. (2011) and Larondelle et al. (2014) provided standardised ETP values for CLC and Urban Atlas LULC classes [21,22].

Indicator *surface emissivity*: ES demand for local climate regulation has been assessed using *surface emissivity* as a proxy. Surface emissivity expresses the land surface thermal emissions, which indicate the total amount of energy that is emitted by a surface [22]. For this indicator, too, Schwarz et al. (2011) and Larondelle et al. (2014) provided standardised surface emissivity values for CLC and Urban Atlas LULC classes [21,22].

We used an equation (1) that normalises the f-ETP and surface emissivity values to a scale between 0 and 1, where 0 indicates low and 1 high ES potential/demand:

$$ES' = (ES - ES_{\min}) / (ES_{\max} - ES_{\min}) \quad (1)$$

where  $ES'$  is the normalised ES,  $ES_{\min}$  is the minimum and  $ES_{\max}$  is the maximum value of ES [29]. Finally, those values were classified into the six ES matrix classes.

We used the InVEST Model *Urban Cooling* [23]. This model calculates a heat mitigation index that estimates the cooling effect of urban green areas based on shade, evapotranspiration, albedo, building intensity, and the distance from green and open spaces. This information must be provided in a biophysical table and linked to LULC types (see Table S5 and S6). We used LULC data, which has also been used for the InVEST pollination model, in raster format (5 x 5 m resolution).

Shade has been calculated using Tree Cover Density [6] from 2015 and the ArcGIS tool zonal statistics to table. For the values of albedo and building intensity, literature data from Stewart and Oke (2012) [17] were used. We used the monthly 1 x 1 km raster of the potential evapotranspiration (ETp) over grass [7] to calculate the crop coefficient ( $K_c$ ), which is needed in the biophysical table. The Food and Agriculture Organization of the United Nations provides  $K_c$  values for crops and for the different crop growth stages [14]. Nistor (2018; 2016) [15,16] provided a list of the different crop growth stages (spring ( $k_c$  ini), summer ( $k_c$  mid), autumn ( $k_c$  end), and winter ( $k_c$  cold)) for each LULC of the CLC dataset. We adapted those values for the Urban Atlas classes (see Figure S1).

| Code C1 | CLC Label                                                                              | Kc cold | Kc ini | Kc mid | Kc end | Urban Atlas Code | Urban Atlas Label                                            | Kc cold | Kc ini | Kc mid | Kc end |
|---------|----------------------------------------------------------------------------------------|---------|--------|--------|--------|------------------|--------------------------------------------------------------|---------|--------|--------|--------|
| 111     | Continuous urban fabric                                                                | 0       | 0.2    | 0.4    | 0.25   | 11100            | Continuous urban fabric (S.L.: > 80%)                        | 0       | 0.2    | 0.4    | 0.25   |
| 112     | Discontinuous urban fabric                                                             | 0       | 0.1    | 0.3    | 0.2    | 11210            | Discontinuous Dense Urban Fabric (S.L.: 50% - 80%)           | 0       | 0.1    | 0.3    | 0.2    |
|         |                                                                                        |         |        |        |        | 11220            | Discontinuous Medium Density Urban Fabric (S.L.: 30% - 50%)  | 0       | 0.17   | 0.51   | 0.34   |
|         |                                                                                        |         |        |        |        | 11230            | Discontinuous Low Density Urban Fabric (S.L.: 10% - 30%)     | 0       | 0.22   | 0.69   | 0.46   |
|         |                                                                                        |         |        |        |        | 11240            | Discontinuous very low density urban fabric (S.L.: < 10%)    | 0       | 0.26   | 0.78   | 0.51   |
| 121     | Industrial or commercial units                                                         | 0       | 0.2    | 0.4    | 0.3    | 12100            | Industrial, commercial, public, military and private units   | 0       | 0.2    | 0.4    | 0.3    |
| 122     | Land principally occupied by agriculture, with significant areas of natural vegetation | 0       | 0.15   | 0.35   | 0.25   | 12210            | Fast transit roads and associated land                       | 0       | 0.15   | 0.35   | 0.25   |
| 123     | Port areas                                                                             | 0       | 0.15   | 0.35   | 0.25   | 12230            | Railways and associated land                                 | 0       | 0.15   | 0.35   | 0.25   |
| 124     | Airports                                                                               | 0       | 0.15   | 0.35   | 0.25   | 12220            | Other roads and associated land                              | 0       | 0.15   | 0.35   | 0.25   |
| 131     | Mineral extraction sites                                                               | 0       | 0.3    | 0.5    | 0.4    | 12300            | Port areas                                                   | 0       | 0.3    | 0.5    | 0.4    |
| 132     | Dump sites                                                                             | 0       | 0.2    | 0.4    | 0.3    | 12400            | Airports                                                     | 0       | 0.2    | 0.4    | 0.3    |
| 133     | Construction sites                                                                     | 0       | 0.16   | 0.36   | 0.26   | 13100            | Mineral extraction and dump sites                            | 0       | 0.16   | 0.36   | 0.26   |
| 141     | Green urban areas                                                                      | 0       | 0.16   | 0.36   | 0.26   | 13100            | Mineral extraction and dump sites                            | 0       | 0.16   | 0.36   | 0.26   |
| 142     | Sport and leisure facilities                                                           | 0       | 0.16   | 0.36   | 0.26   | 13300            | Construction sites                                           | 0       | 0.16   | 0.36   | 0.26   |
| 211     | Non-irrigated arable land                                                              | 0       | 0.12   | 0.32   | 0.22   | 14100            | Green urban areas                                            | 0       | 0.12   | 0.32   | 0.22   |
| 212     | Permanently irrigated land                                                             | 0       | 0.1    | 0.3    | 0.2    | 14200            | Sports and leisure facilities                                | 0       | 0.1    | 0.3    | 0.2    |
| 213     | Rice fields                                                                            | 0       | 1.1    | 1.35   | 1.25   | 21000            | Arable land (annual crops)                                   | 0       | 1.12   | 1.33   | 1.07   |
| 221     | Vineyards                                                                              | 0       | 1.2    | 1.45   | 1.35   |                  |                                                              |         |        |        |        |
| 222     | Fruit trees and berry plantations                                                      | 0       | 1.05   | 1.2    | 0.6    | 22000            | Permanent crops (vineyards, fruit trees, olive groves)       | 0       | 0.42   | 0.82   | 0.53   |
| 223     | Olive groves                                                                           | 0       | 0.3    | 0.7    | 0.45   |                  |                                                              |         |        |        |        |
| 231     | Pastures                                                                               | 0       | 0.3    | 0.7    | 0.45   | 23000            | Pastures                                                     | 0       | 0.4    | 0.9    | 0.8    |
| 241     | Complex cultivation patterns                                                           | 0       | 0.4    | 0.9    | 0.8    | 24000            | Complex and mixed cultivation patterns                       | 0       | 1.1    | 1.35   | 1.25   |
| 242     | Land principally occupied by agriculture, with significant areas of natural vegetation | 0       | 0.5    | 0.8    | 0.7    | 25000            | Orchards                                                     | 0       | 0.7    | 1.15   | 1      |
| 243     | Agro-forestry areas                                                                    | 0       | 1.1    | 1.35   | 1.25   | 31000            | Forests                                                      | 0.6     | 1.3    | 1.6    | 1.5    |
| 311     | Broad-leaved forest                                                                    | 0.3     | 0.9    | 1.1    | 1.05   |                  |                                                              |         |        |        |        |
| 312     | Coniferous forest                                                                      | 0.6     | 1.3    | 1.6    | 1.5    | 32000            | Herbaceous vegetation associations (natural grassland, moor) | 0       | 0.5375 | 1.0125 | 0.95   |
| 313     | Mixed forest                                                                           | 1       | 1      | 1      | 1      |                  |                                                              |         |        |        |        |
| 321     | Natural grasslands                                                                     | 0.8     | 1.2    | 1.5    | 1.3    |                  |                                                              |         |        |        |        |
| 322     | Moors and heathland                                                                    | 0       | 0.3    | 1.15   | 1.1    |                  |                                                              |         |        |        |        |
|         |                                                                                        | 0       | 0.8    | 1      | 0.95   |                  |                                                              |         |        |        |        |

Figure S1: Standardised Kc values for CORINE Land Cover and Urban Atlas, adapted from Nistor (2018; 2016) [61,62].

We used 120 m as the maximum air temperature blending distance based on the literature values of Huang et al. (2018) and Goldenberg et al. (2017) [30,31]. The Climate Data Center (CDC) provided data for the rural reference temperature (°C) [9]. The Global Surface UHI Explorer [10] provided the nightly magnitude of the urban heat island effect, which expresses the difference between the maximum temperature in the city and the rural areas by night.

Table S8. Biophysical table for the InVEST model *Urban Cooling*, urban region of Munich.

| lucode | lulc_desc                                                   | shade | kc   | albedo | green_area | building_intensity |
|--------|-------------------------------------------------------------|-------|------|--------|------------|--------------------|
| 211    | Non-irrigated arable land                                   | 0.02  | 1.09 | 0.2    | 1          | 0.05               |
| 222    | Fruit trees and berry plantations                           | 0.02  | 0.69 | 0.225  | 1          | 0.05               |
| 311    | Broad-leaved forest                                         | 0.75  | 1.38 | 0.15   | 1          | 0.05               |
| 312    | Coniferous forest                                           | 0.84  | 1    | 0.15   | 1          | 0.05               |
| 313    | Mixed forest                                                | 0.82  | 1.32 | 0.15   | 1          | 0.05               |
| 321    | Natural grasslands                                          | 0.17  | 0.79 | 0.2    | 1          | 0.05               |
| 322    | Moors and heathland                                         | 0.68  | 0.8  | 0.225  | 1          | 0.05               |
| 324    | Transitional woodland-shrub                                 | 0.65  | 0.8  | 0.225  | 1          | 0.05               |
| 331    | Beaches, dunes, sands                                       | 0.03  | 0.23 | 0.275  | 0          | 0.05               |
| 332    | Bare rocks                                                  | 0.07  | 0.15 | 0.225  | 0          | 0.05               |
| 333    | Sparsely vegetated areas                                    | 0.20  | 0.46 | 0.25   | 1          | 0.05               |
| 411    | Inland marshes                                              | 0.19  | 0.34 | 0.225  | 1          | 0.05               |
| 412    | Peat bogs                                                   | 0.25  | 0.29 | 0.225  | 1          | 0.05               |
| 512    | Water bodies                                                | 0.03  | 0.5  | 0.06   | 1          | 0.05               |
| 11100  | Continuous urban fabric (S.L.: > 80%)                       | 0.05  | 0.29 | 0.15   | 0          | 0.55               |
| 11210  | Discontinuous dense urban fabric (S.L.: 50% - 80%)          | 0.14  | 0.2  | 0.15   | 0          | 0.55               |
| 11220  | Discontinuous medium-density urban fabric (S.L.: 30% - 50%) | 0.14  | 0.35 | 0.185  | 0          | 0.3                |
| 11230  | Discontinuous low-density urban fabric (S.L.: 10% - 30%)    | 0.12  | 0.47 | 0.185  | 1          | 0.3                |
| 11240  | Discontinuous very low-density urban fabric (S.L.: < 10%)   | 0.05  | 0.53 | 0.185  | 1          | 0.15               |
| 11300  | Isolated Structures                                         | 0.06  | 0.53 | 0.185  | 1          | 0.15               |

|       |                                                                  |      |      |       |   |      |
|-------|------------------------------------------------------------------|------|------|-------|---|------|
| 12100 | Industrial, commercial, public, military and private units       | 0.07 | 0.29 | 0.185 | 0 | 0,35 |
| 12210 | Fast transit roads and associated land                           | 0.09 | 0.25 | 0.2   | 0 | 0,4  |
| 12220 | Other roads and associated land                                  | 0.08 | 0.25 | 0.2   | 0 | 0,4  |
| 12230 | Railways and associated land                                     | 0.10 | 0.25 | 0.2   | 0 | 0,4  |
| 12300 | Port areas                                                       | 0.00 | 0.38 | 0.16  | 0 | 0,25 |
| 12400 | Airports                                                         | 0.02 | 0.29 | 0.225 | 0 | 0,05 |
| 13100 | Mineral extraction and dump sites                                | 0.02 | 0.26 | 0.275 | 0 | 0,05 |
| 13300 | Construction sites                                               | 0.03 | 0.26 | 0.275 | 0 | 0,05 |
| 13400 | Land without current use                                         | 0.15 | 0.2  | 0.25  | 0 | 0,05 |
| 14100 | Green urban areas                                                | 0.41 | 0.22 | 0.2   | 1 | 0,05 |
| 14200 | Sports and leisure facilities                                    | 0.13 | 0.2  | 0.2   | 1 | 0,05 |
| 21000 | Arable land (annual crops)                                       | 0.05 | 1.07 | 0.2   | 1 | 0,05 |
| 22000 | Permanent crops (vineyards, fruit trees, olive groves)           | 0.05 | 0.59 | 0.2   | 1 | 0,05 |
| 23000 | Pastures                                                         | 0.03 | 0.65 | 0.2   | 1 | 0,05 |
| 31000 | Forests                                                          | 0.53 | 1.38 | 0.175 | 1 | 0,05 |
| 32000 | Herbaceous vegetation associations (natural grassland, moors...) | 0.05 | 0.75 | 0.2   | 1 | 0,05 |
| 40000 | Wetlands                                                         | 0.14 | 0.34 | 0.06  | 1 | 0,05 |
| 50000 | Water                                                            | 0.17 | 0.53 | 0.06  | 1 | 0,05 |

Table S9. Biophysical table for the InVEST model *Urban Cooling*, urban region of Rostock.

| lucode | lulc_desc                                                   | shade | kc   | albedo | green_area | building_intensity |
|--------|-------------------------------------------------------------|-------|------|--------|------------|--------------------|
| 211    | Non-irrigated arable land                                   | 0.01  | 1.11 | 0.2    | 1          | 0.05               |
| 222    | Fruit trees and berry plantations                           | 0.01  | 0.71 | 0.225  | 1          | 0.05               |
| 311    | Broad-leaved forest                                         | 0.79  | 1.4  | 0.15   | 1          | 0.05               |
| 312    | Coniferous forest                                           | 0.79  | 1    | 0.15   | 1          | 0.05               |
| 313    | Mixed forest                                                | 0.79  | 1.33 | 0.15   | 1          | 0.05               |
| 321    | Natural grasslands                                          | 0.08  | 0.8  | 0.2    | 1          | 0.05               |
| 322    | Moors and heathland                                         | 0.1   | 0.82 | 0.225  | 1          | 0.05               |
| 333    | Sparsely vegetated areas                                    | 0.04  | 0.47 | 0.25   | 1          | 0.05               |
| 334    | Burnt areas                                                 | 0.74  | 0.47 | 0.275  | 0          | 0.05               |
| 411    | Inland marshes                                              | 0.17  | 0.34 | 0.225  | 1          | 0.05               |
| 412    | Peat bogs                                                   | 0.24  | 0.29 | 0.225  | 1          | 0.05               |
| 511    | Water courses                                               | 0     | 0.5  | 0.06   | 1          | 0.05               |
| 512    | Water bodies                                                | 0     | 0.5  | 0.06   | 1          | 0.05               |
| 521    | Coastal lagoons                                             | 0     | 0.5  | 0.06   | 1          | 0.05               |
| 523    | Sea and ocean                                               | 0     | 0.5  | 0.06   | 1          | 0.05               |
| 11100  | Continuous urban fabric (S.L.: > 80%)                       | 0.02  | 0.29 | 0.15   | 0          | 0.55               |
| 11210  | Discontinuous dense urban fabric (S.L.: 50% - 80%)          | 0.1   | 0.21 | 0.15   | 0          | 0.55               |
| 11220  | Discontinuous medium-density urban fabric (S.L.: 30% - 50%) | 0.1   | 0.35 | 0.185  | 0          | 0.3                |
| 11230  | Discontinuous low-density urban fabric (S.L.: 10% - 30%)    | 0.08  | 0.48 | 0.185  | 1          | 0.3                |
| 11240  | Discontinuous very low-density urban fabric (S.L.: < 10%)   | 0.09  | 0.54 | 0.185  | 1          | 0.15               |
| 11300  | Isolated Structures                                         | 0.06  | 0.54 | 0.185  | 1          | 0.15               |

|       |                                                                                 |      |      |       |   |      |
|-------|---------------------------------------------------------------------------------|------|------|-------|---|------|
| 12100 | Industrial, commercial, public, military and private units                      | 0.05 | 0.3  | 0.185 | 0 | 0.35 |
| 12210 | Fast transit roads and associated land                                          | 0.05 | 0.25 | 0.2   | 0 | 0.4  |
| 12220 | Other roads and associated land                                                 | 0.08 | 0.25 | 0.2   | 0 | 0.4  |
| 12230 | Railways and associated land                                                    | 0.11 | 0.25 | 0.2   | 0 | 0.4  |
| 12300 | Port areas                                                                      | 0.03 | 0.38 | 0.16  | 0 | 0.25 |
| 12400 | Airports                                                                        | 0.02 | 0.3  | 0.225 | 0 | 0.05 |
| 13100 | Mineral extraction and dump sites                                               | 0.02 | 0.26 | 0.275 | 0 | 0    |
| 13300 | Construction sites                                                              | 0.02 | 0.26 | 0.275 | 0 | 0.05 |
| 13400 | Land without current use                                                        | 0.18 | 0.21 | 0.25  | 0 | 0.05 |
| 14100 | Green urban areas                                                               | 0.4  | 0.23 | 0.2   | 1 | 0.05 |
| 14200 | Sports and leisure facilities                                                   | 0.16 | 0.21 | 0.2   | 1 | 0.05 |
| 21000 | Arable land (annual crops)                                                      | 0.01 | 1.1  | 0.2   | 1 | 0.05 |
| 22000 | Permanent crops (vineyards, fruit trees, olive groves)                          | 0.15 | 0.6  | 0.2   | 1 | 0.05 |
| 23000 | Pastures                                                                        | 0.04 | 0.66 | 0.2   | 1 | 0.05 |
| 31000 | Forests                                                                         | 0.66 | 1.4  | 0.175 | 1 | 0.05 |
| 32000 | Herbaceous vegetation associations (natural grassland, moors...)                | 0.29 | 0.77 | 0.2   | 1 | 0.05 |
| 33000 | Open spaces with little or no vegetation (beaches, dunes, bare rocks, glaciers) | 0.01 | 0.47 | 0.275 | 0 | 0.05 |
| 40000 | Wetlands                                                                        | 0.16 | 0.34 | 0.06  | 1 | 0.05 |
| 50000 | Water                                                                           | 0.17 | 0.54 | 0.06  | 1 | 0.05 |

## 5. Coastal protection

The demand for coastal protection can be expressed in different ways. It can, for example, be expressed by the need or desire of the population to reduce or avoid the risks caused by flooding, increased current velocities, storm surges, sediment erosion or sea-level rise. The assessment of the demand can be assessed following the Floods Directive (Directive 2007/60/EC) of the European Parliament on the assessment and management of flood risks. In Germany, the Floods Directive is used to assess and manage flood risks and to protect assets (in German: Schutzgüter) like human health, the environment, cultural heritage and human economic activities. The directive considers both river and coastal flood events. Flood hazard and risk maps show areas at significant risk, expected flood extents and water depths for three scenarios [11]. We mapped an exemplary coastal flood event with a statistical 200-year recurrence interval and followed the methodology steps from INTEK (2014) [13]:

1. Classification of expected water depths (=flood hazard) into six classes (see Table S10);

Table S10: Classification of flood hazard

| Classification | Flood hazard | Expected water depth (m) |
|----------------|--------------|--------------------------|
| 5              | Very high    | >4                       |
| 4              | High         | >2 - ≤4                  |
| 3              | Medium       | >1 - ≤2                  |
| 2              | Low          | >0.5 - ≤1                |
| 1              | Very low     | >0 - ≤0.5                |
| 0              | Extreme low  | 0                        |

2. Classification of the potential damage for each asset into six classes (Table S11 – Table S14). The assets were derived from population density, biotopes, runoff paths, digital elevation model, historical buildings, LULC;

Table S11: Classification of the potential damage for the asset cultural heritage.

| Classification | Potential damage | Buildings            |
|----------------|------------------|----------------------|
| 5              | Very high        | Historical buildings |

|   |             |   |
|---|-------------|---|
| 4 | High        | - |
| 3 | Medium      | - |
| 2 | Low         | - |
| 1 | Very low    | - |
| 0 | Extreme low | - |

Table S12: Classification of the potential damage for the asset environment.

| Classification | Potential damage | Biotops                                                                                                                     |
|----------------|------------------|-----------------------------------------------------------------------------------------------------------------------------|
| 5              | Very high        | -                                                                                                                           |
| 4              | High             | -                                                                                                                           |
| 3              | Medium           | -                                                                                                                           |
| 2              | Low              | Biotopes downstream of industrial buildings classified as IED buildings/areas (Industrial Emissions Directive (2010/75/EU)) |
| 1              | Very low         | Other biotopes                                                                                                              |
| 0              | Extreme low      | Water and wetland biotopes                                                                                                  |

Table S13: Classification of the potential damage for the asset infrastructure.

| Classification | Potential damage | Infrastructure                             |
|----------------|------------------|--------------------------------------------|
| 5              | Very high        | -                                          |
| 4              | High             | -                                          |
| 3              | Medium           | Main roads, port facilities, railway lines |
| 2              | Low              | Other streets                              |
| 1              | Very low         | Paths                                      |
| 0              | Extreme low      | -                                          |

Table S14: Classification of the potential damage for the asset human economic activities.

| Classification | Potential damage | LULC                                                  |
|----------------|------------------|-------------------------------------------------------|
| 5              | Very high        | -                                                     |
| 4              | High             | Industrial and commercial area, residential area      |
| 3              | Medium           | Tree nursery, orchard, garden, sport and leisure area |
| 2              | Low              | Cemetery                                              |
| 1              | Very low         | Agricultural area, pastures, forest                   |
| 0              | Extreme low      | -                                                     |

3. Calculation of the coastal flood risk by multiplying flood hazard values with the potential damage values;
4. Classification of the coastal flood risk of each asset into six ES classes (Table S15).

Table S15: Classification of the coastal flood risks into six ES classes

| Asset        | Classification         |
|--------------|------------------------|
| Human health | 5 – very high: >100    |
|              | 4 – high: >75 - ≤100   |
|              | 3 – medium: >50 - ≤75  |
|              | 2 – low: >25 - ≤50     |
|              | 1 – very low: >0 - ≤25 |
|              | 0 – extreme low: 0     |

|                           |                                                                                                                                                                                 |
|---------------------------|---------------------------------------------------------------------------------------------------------------------------------------------------------------------------------|
| Cultural heritage         | 5 – very high: $\geq 4.5$<br>4 – high: $\geq 3.5 - < 4.5$<br>3 – medium: $\geq 2.5 - < 3.5$<br>2 – low: $\geq 1.5 - < 2.5$<br>1 – very low: $> 0 - < 1.5$<br>0 – extreme low: 0 |
| Environment               | 5 – very high: $> 7$<br>4 – high: $> 5 - \leq 7$<br>3 – medium: $> 3 - \leq 5$<br>2 – low: $> 2 - \leq 3$<br>1 – very low: $> 1 - \leq 2$<br>0 – not relevant: 0                |
| Infrastructure            | 5 – very high: $> 7$<br>4 – high: $> 5 - \leq 7$<br>3 – medium: $> 3 - \leq 5$<br>2 – low: $> 2 - \leq 3$<br>1 – very low: $> 1 - \leq 2$<br>0 – not relevant: 0                |
| Human economic activities | 5 – very high: $> 7$<br>4 – high: $> 5 - \leq 7$<br>3 – medium: $> 3 - \leq 5$<br>2 – low: $> 2 - \leq 3$<br>1 – very low: $> 1 - \leq 2$<br>0 – not relevant: 0                |

## References

1. Eurostat. Countries. Available online: <https://ec.europa.eu/eurostat/web/gisco/geodata/reference-data/administrative-units-statistical-units/countries#countries20> (accessed on 22 March 2022).
2. European Environment Agency. Urban Atlas 2012. Available online: <https://land.copernicus.eu/local/urban-atlas/urban-atlas-2012?tab=metadata> (accessed on 21 April 2021).
3. European Environment Agency. Corine Land Cover (CLC) 2012. Available online: <https://land.copernicus.eu/pan-european/corine-land-cover/clc-2012?tab=metadata>.
4. Statistisches Bundesamt. Ergebnisse des Zensus 2011 zum Download - erweitert. Available online: [https://www.zensus2011.de/DE/Home/Aktuelles/DemografischeGrunddaten.html?sessionId=6E45AA84910CD1717DDD8A2D100A5DE1.1\\_cid380?nn=3065474](https://www.zensus2011.de/DE/Home/Aktuelles/DemografischeGrunddaten.html?sessionId=6E45AA84910CD1717DDD8A2D100A5DE1.1_cid380?nn=3065474) (accessed on 21 April 2021).
5. Bundesamt für Kartographie und Geodäsie. Geographische Gitter für Deutschland in Lambert-Projektion (GeoGitter Inspire). Available online: <https://gdz.bkg.bund.de/index.php/default/digitale-geodaten.html> (accessed on 21 April 2021).
6. European Environment Agency. Tree Cover Density. Available online: <https://land.copernicus.eu/pan-european/high-resolution-layers/forests/tree-cover-density> (accessed on 21 April 2021).
7. Climate Data Center. Datensatzbeschreibung. Monatliche Raster der potenziellen Evapotranspiration über Gras, Version 0.x. Available online: [https://opendata.dwd.de/climate\\_environment/CDC/grids\\_germany/monthly/evapo\\_p/BESCHREIBUNG\\_gridsg\\_ermany\\_monthly\\_evapo\\_p\\_de.pdf](https://opendata.dwd.de/climate_environment/CDC/grids_germany/monthly/evapo_p/BESCHREIBUNG_gridsg_ermany_monthly_evapo_p_de.pdf) (accessed on 21 April 2021).
8. Climate Data Center. Berechnete monatliche Werte von charakteristischen Elementen aus dem Boden und dem Pflanzenbestand., Version v19.3. Available online: [https://opendata.dwd.de/climate\\_environment/CDC/derived\\_germany/soil/monthly/historical/BESCHREIBUNG\\_derivgermany\\_soil\\_monthly\\_historical\\_de.pdf](https://opendata.dwd.de/climate_environment/CDC/derived_germany/soil/monthly/historical/BESCHREIBUNG_derivgermany_soil_monthly_historical_de.pdf) (accessed on 21 April 2021).
9. Climate Data Center. Historische tägliche Stationsbeobachtungen (Temperatur, Druck, Niederschlag, Sonnenscheindauer, etc.) für Deutschland. Available online:

- [https://opendata.dwd.de/climate\\_environment/CDC/observations\\_germany/climate/daily/kl/historical/](https://opendata.dwd.de/climate_environment/CDC/observations_germany/climate/daily/kl/historical/) (accessed on 21 April 2021).
10. Yale University. Global Surface UHI Explorer. Available online: <https://yceo.yale.edu/research/global-surface-uhi-explorer> (accessed on 21 April 2021).
  11. Landesamt für Umwelt, Naturschutz und Geologie Mecklenburg-Vorpommern. Kartenportal Umwelt Mecklenburg-Vorpommern. Available online: <https://www.umweltkarten.mv-regierung.de/atlas/script/index.php> (accessed on 22 March 2022).
  12. Landesamt für innere Verwaltung Mecklenburg-Vorpommern. Digitale Landschaftsmodelle. Available online: <https://www.laiv-mv.de/Geoinformation/Geobasisdaten/Landschaftsmodelle/> (accessed on 22 March 2022).
  13. INTEK. Integriertes Entwässerungskonzept (INTEK). Fachkonzept zur Anpassung der Entwässerungssysteme an die Urbanisierung und den Klimawandel. Phase 3: Einzugsgebietsbezogene Analysen der Hochwasserrisiken. **2014**.
  14. Allen, R.G.; Pereira, L.S.; Raes, D.; Smith, M. *Crop evapotranspiration - Guidelines for computing crop water requirements - FAO Irrigation and drainage paper 56*; Rome, 1998, ISBN 92-5-104219-5.
  15. Nistor, M.M. Mapping evapotranspiration coefficients in the Paris metropolitan area. *Georeview* **2016**, *27*.
  16. Nistor, M.-M. Projection of Annual Crop Coefficients in Italy Based on Climate Models and Land Cover Data. *Geographia Technica* **2018**, *13*, 97–113, doi:10.21163/GT\_2018.132.08.
  17. Stewart, I.D.; Oke, T.R. Local Climate Zones for Urban Temperature Studies. *Bulletin of the American Meteorological Society* **2012**, *93*, 1879–1900, doi:10.1175/BAMS-D-11-00019.1.
  18. Zulian, G.; Paracchini, M.L.; Maes, J.; Liquete, C. *ESTIMAP: Ecosystem services mapping at European scale*; Publications Office of the European Union: Luxembourg, 2013, ISBN 978-92-79-35274-4.
  19. The Natural Capital Project. Pollinator Abundance: Crop Pollination. Available online: <https://invest-userguide.readthedocs.io/en/latest/croppollination.html> (accessed on 20 August 2021).
  20. Klein, A.-M.; Vaissière, B.E.; Cane, J.H.; Steffan-Dewenter, I.; Cunningham, S.A.; Kremen, C.; Tscharntke, T. Importance of pollinators in changing landscapes for world crops. *Proc. Biol. Sci.* **2007**, *274*, 303–313, doi:10.1098/rspb.2006.3721.
  21. Schwarz, N.; Bauer, A.; Haase, D. Assessing climate impacts of planning policies—An estimation for the urban region of Leipzig (Germany). *Environmental Impact Assessment Review* **2011**, *31*, 97–111, doi:10.1016/j.eiar.2010.02.002.
  22. Larondelle, N.; Haase, D.; Kabisch, N. Mapping the diversity of regulating ecosystem services in European cities. *Global Environmental Change* **2014**, *26*, 119–129, doi:10.1016/j.gloenvcha.2014.04.008.
  23. The Natural Capital Project. Urban Cooling Model. Available online: [http://releases.naturalcapitalproject.org/invest-userguide/latest/urban\\_cooling\\_model.html](http://releases.naturalcapitalproject.org/invest-userguide/latest/urban_cooling_model.html) (accessed on 2 July 2020).
  24. Burkhard, B. Ecosystem services matrix. In *Mapping Ecosystem Services*; Burkhard, B., Maes, J., Eds.; Pensoft Publishers: Sofia, 2017; pp 225–230, ISBN 9789546428295.
  25. Bay.StMELF. Zentrale InVeKoS Datenbank (ZID). Available online: <https://www.zi-daten.de/> (accessed on 21 April 2021).
  26. Schulp, C.; Lautenbach, S.; Verburg, P.H. Quantifying and mapping ecosystem services: Demand and supply of pollination in the European Union. *Ecological Indicators* **2014**, *36*, 131–141, doi:10.1016/j.ecolind.2013.07.014.

- 
27. Perennes, M.; Diekötter, T.; Groß, J.; Burkhard, B. A hierarchical framework for mapping pollination ecosystem service potential at the local scale. *Ecological Modelling* **2021**, *444*, 109484, doi:10.1016/j.ecolmodel.2021.109484.
  28. Zardo, L.; Geneletti, D.; Pérez-Soba, M.; van Eupen, M. Estimating the cooling capacity of green infrastructures to support urban planning. *Ecosystem Services* **2017**, *26*, 225–235, doi:10.1016/j.ecoser.2017.06.016.
  29. Lorilla, R.; Poirazidis, K.; Kalogirou, S.; Detsis, V.; Martinis, A. Assessment of the Spatial Dynamics and Interactions among Multiple Ecosystem Services to Promote Effective Policy Making across Mediterranean Island Landscapes. *Sustainability* **2018**, *10*, 3285, doi:10.3390/su10093285.
  30. Huang, M.; Cui, P.; He, X. Study of the Cooling Effects of Urban Green Space in Harbin in Terms of Reducing the Heat Island Effect. *Sustainability* **2018**, *10*, 1101, doi:10.3390/su10041101.
  31. Goldenberg, R.; Kalantari, Z.; Cvetkovic, V.; Mörtberg, U.; Deal, B.; Destouni, G. Distinction, quantification and mapping of potential and realized supply-demand of flow-dependent ecosystem services. *Sci. Total Environ.* **2017**, *593–594*, 599–609, doi:10.1016/j.scitotenv.2017.03.130.
