# Supplementary material for: Challenges Entailed in Applying Ecosystem Services Supply and Demand Mapping Approaches: A Practice Report
Source: MDPI journal article supplement (doi:10.3390/land12010052), 2022-12-24
Supplement: s1 [file s1 › Supplementary material_S2_V4.pdf]

## Supplementary Materials S2

Table S16. Expert-based ES matrix approach, ES supply, urban region of Rostock, n=15. Weighted mean values.

|                                 | Food (from cultivated terrestrial plants) | Raw materials (from cultivated terrestrial plants) | Drinking water | Maintaining nursery populations and habitats | Pollination | Flood and coastal protection | Local climate regulation | Recreation | Aesthetic |
|---------------------------------|-------------------------------------------|----------------------------------------------------|----------------|----------------------------------------------|-------------|------------------------------|--------------------------|------------|-----------|
| Water bodies                    | 1.07                                      | 1.74                                               | 4.69           | 4.00                                         | 1.37        | 3.67                         | 3.91                     | 3.74       | 4.03      |
| Agricultural areas              | 4.41                                      | 3.94                                               | 2.10           | 2.42                                         | 2.90        | 1.68                         | 2.55                     | 1.74       | 2.76      |
| Forests                         | 1.11                                      | 3.40                                               | 2.75           | 4.25                                         | 3.48        | 2.99                         | 4.53                     | 4.17       | 4.21      |
| Open vegetation                 | 0.90                                      | 1.21                                               | 2.30           | 3.82                                         | 3.70        | 2.45                         | 3.18                     | 2.81       | 3.48      |
| Wetlands                        | 0.44                                      | 0.83                                               | 3.12           | 4.04                                         | 3.30        | 3.82                         | 4.05                     | 2.33       | 3.66      |
| Urban green areas               | 0.33                                      | 0.46                                               | 1.51           | 3.21                                         | 3.13        | 1.59                         | 3.66                     | 3.73       | 3.29      |
| Residential area                | 0.25                                      | 0.15                                               | 0.54           | 1.16                                         | 0.74        | 1.02                         | 0.83                     | 0.66       | 0.98      |
| Infrastructure                  | 0.00                                      | 0.00                                               | 0.17           | 0.58                                         | 0.34        | 0.64                         | 0.29                     | 0.82       | 0.52      |
| Industrial and commercial areas | 0.30                                      | 0.31                                               | 0.49           | 1.24                                         | 0.92        | 0.65                         | 0.77                     | 0.36       | 0.33      |

Table S17. Expert-based ES matrix approach, ES supply, urban region of Munich, n=12. Weighted mean values.

|                                 | Food (from cultivated terrestrial plants) | Raw materials (from cultivated terrestrial plants) | Drinking water | Maintaining nursery populations and habitats | Pollination | Flood and coastal protection | Local climate regulation | Recreation | Aesthetic |
|---------------------------------|-------------------------------------------|----------------------------------------------------|----------------|----------------------------------------------|-------------|------------------------------|--------------------------|------------|-----------|
| Water bodies                    | 0.00                                      | 0.36                                               | 1.32           | 3.10                                         | 0.00        | 2.96                         | 2.95                     | 3.30       | 3.02      |
| Agricultural areas              | 3.96                                      | 3.37                                               | 1.28           | 2.10                                         | 1.93        | 1.73                         | 2.59                     | 2.45       | 1.17      |
| Forests                         | 0.66                                      | 3.33                                               | 2.61           | 3.18                                         | 2.67        | 2.47                         | 3.67                     | 3.75       | 3.34      |
| Open vegetation                 | 0.51                                      | 1.02                                               | 1.93           | 3.62                                         | 3.40        | 2.06                         | 2.76                     | 3.74       | 3.33      |
| Wetlands                        | 0.83                                      | 1.01                                               | 1.82           | 3.36                                         | 2.58        | 3.34                         | 3.30                     | 2.91       | 3.10      |
| Urban green areas               | 0.25                                      | 0.56                                               | 0.78           | 2.83                                         | 3.01        | 1.80                         | 3.41                     | 4.42       | 3.67      |
| Residential area                | 0.15                                      | 0.00                                               | 0.06           | 1.07                                         | 0.44        | 0.22                         | 0.38                     | 0.20       | 0.46      |
| Infrastructure                  | 0.00                                      | 0.16                                               | 0.00           | 0.86                                         | 0.46        | 0.02                         | 0.26                     | 0.40       | 0.22      |
| Industrial and commercial areas | 0.16                                      | 0.33                                               | 0.06           | 0.59                                         | 0.38        | 0.48                         | 0.71                     | 0.09       | 0.07      |

Table S18. Similarity values of the map comparison between the maps from expert estimates (expert-based ES matrix approach) and the indicator *green and blue area (%)* (LULC data) in the urban region of Munich. 0 indicates no similarity. and 1 very high similarity between the compared maps.

| LULC | Mean | Std. dev. |
|------|------|-----------|
|------|------|-----------|

|                                 |      |      |
|---------------------------------|------|------|
| Residential area                | 0.92 | 0.08 |
| Industrial and commercial areas | 0.88 | 0.07 |
| Urban green areas               | 0.52 | 0.20 |
| Water bodies                    | 0.52 | 0.13 |
| Agricultural areas              | 0.58 | 0.13 |
| Forests                         | 0.49 | 0.22 |
| Open vegetation                 | 0.57 | 0.14 |
| Wetlands                        | 0.46 | 0.14 |
| Infrastructure                  | 0.92 | 0.12 |

Table S19. Similarity values of the map comparison between the maps from expert estimates (expert-based ES matrix approach) and the indicator *f-ETP-Index* (literature data) in the urban region of Munich. 0 indicates no similarity. and 1 very high similarity between the compared maps.

| LULC                            | Mean | Std. dev. |
|---------------------------------|------|-----------|
| Residential area                | 0.89 | 0.09      |
| Industrial and commercial areas | 0.82 | 0.09      |
| Urban green areas               | 0.68 | 0.17      |
| Water bodies                    | 0.65 | 0.13      |
| Agricultural areas              | 0.96 | 0.10      |
| Forests                         | 0.91 | 0.10      |
| Open vegetation                 | 0.86 | 0.17      |
| Wetlands                        | 0.86 | 0.09      |
| Infrastructure                  | 0.90 | 0.12      |

Table S20. Similarity values of the map comparison between the maps from expert estimates (expert-based ES matrix approach) and the indicator *heat mitigation index* (InVEST model *Urban cooling*) in the urban region of Munich. 0 indicates no similarity. and 1 very high similarity between the compared maps.

| LULC                            | Mean | Std. dev. |
|---------------------------------|------|-----------|
| Residential area                | 0.84 | 0.22      |
| Industrial and commercial areas | 0.86 | 0.26      |
| Urban green areas               | 0.76 | 0.15      |
| Water bodies                    | 0.66 | 0.10      |
| Agricultural areas              | 0.58 | 0.10      |
| Forests                         | 0.75 | 0.06      |
| Open vegetation                 | 0.64 | 0.11      |
| Wetlands                        | 0.66 | 0.02      |
| Infrastructure                  | 0.70 | 0.30      |

Figure S2. Expert estimates of ES supply of food (from cultivated terrestrial plants). Urban region of Rostock.

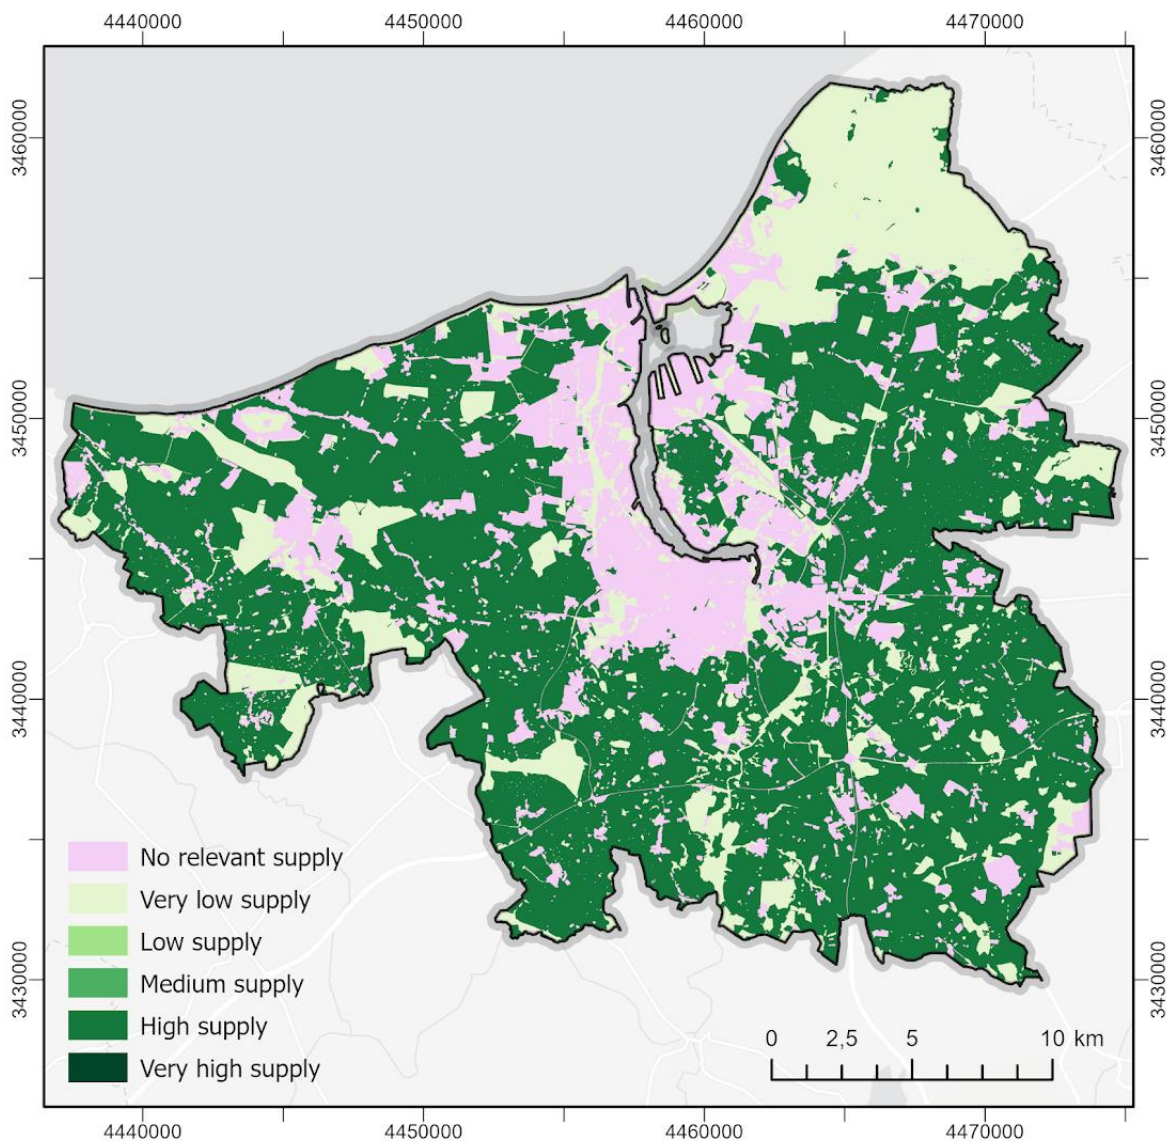

Data: Expert-based ES supply assessment, n=15; ATKIS © GeoBasis-DE/M-V 2017; Urban Atlas © EEA 2016; © EuroGeographics for the administrative boundaries (2020).

Basemap: Esri, HERE, Garmin, FAO, METI/NASA, USGS.

Figure S3. Expert estimates of ES supply of raw materials (from cultivated terrestrial plants). Urban region of Rostock.

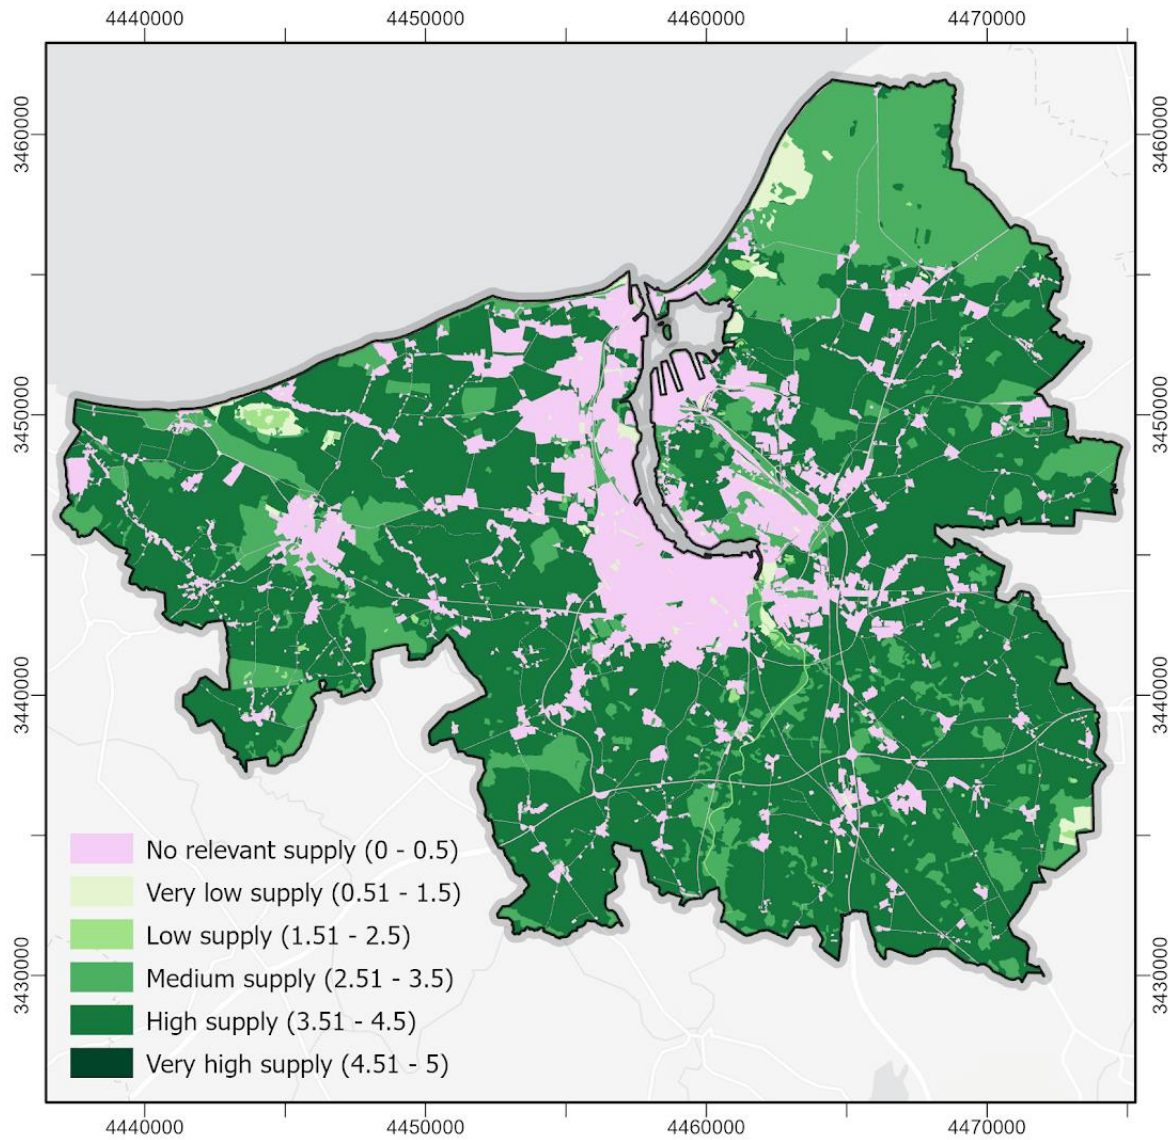

Data: Expert-based ES supply assessment, n=15; Urban Atlas © EEA 2016; © EuroGeographics for the administrative boundaries (2020).

Basemap: Esri, HERE, Garmin, FAO, METI/NASA, USGS.

Figure S4. Expert estimates of ES supply of pollination. Urban region of Rostock.

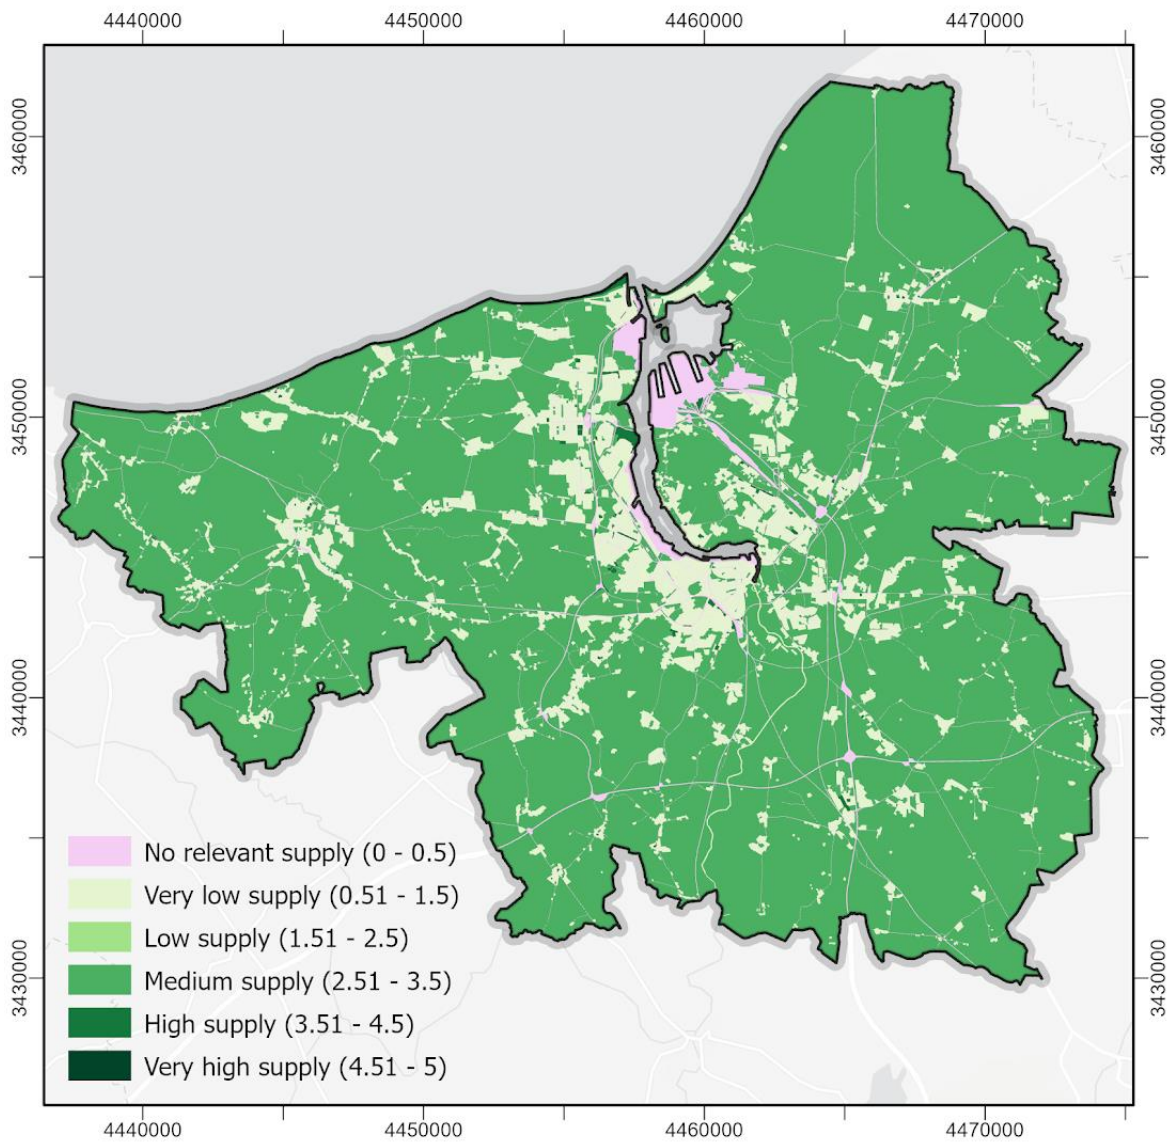

Data: Expert-based ES supply assessment, n=15; Urban Atlas © EEA 2016; © EuroGeographics for the administrative boundaries (2020).

Basemap: Esri, HERE, Garmin, FAO, METI/NASA, USGS.

Figure S5. Expert estimates of ES supply of local climate regulation. Urban region of Rostock.

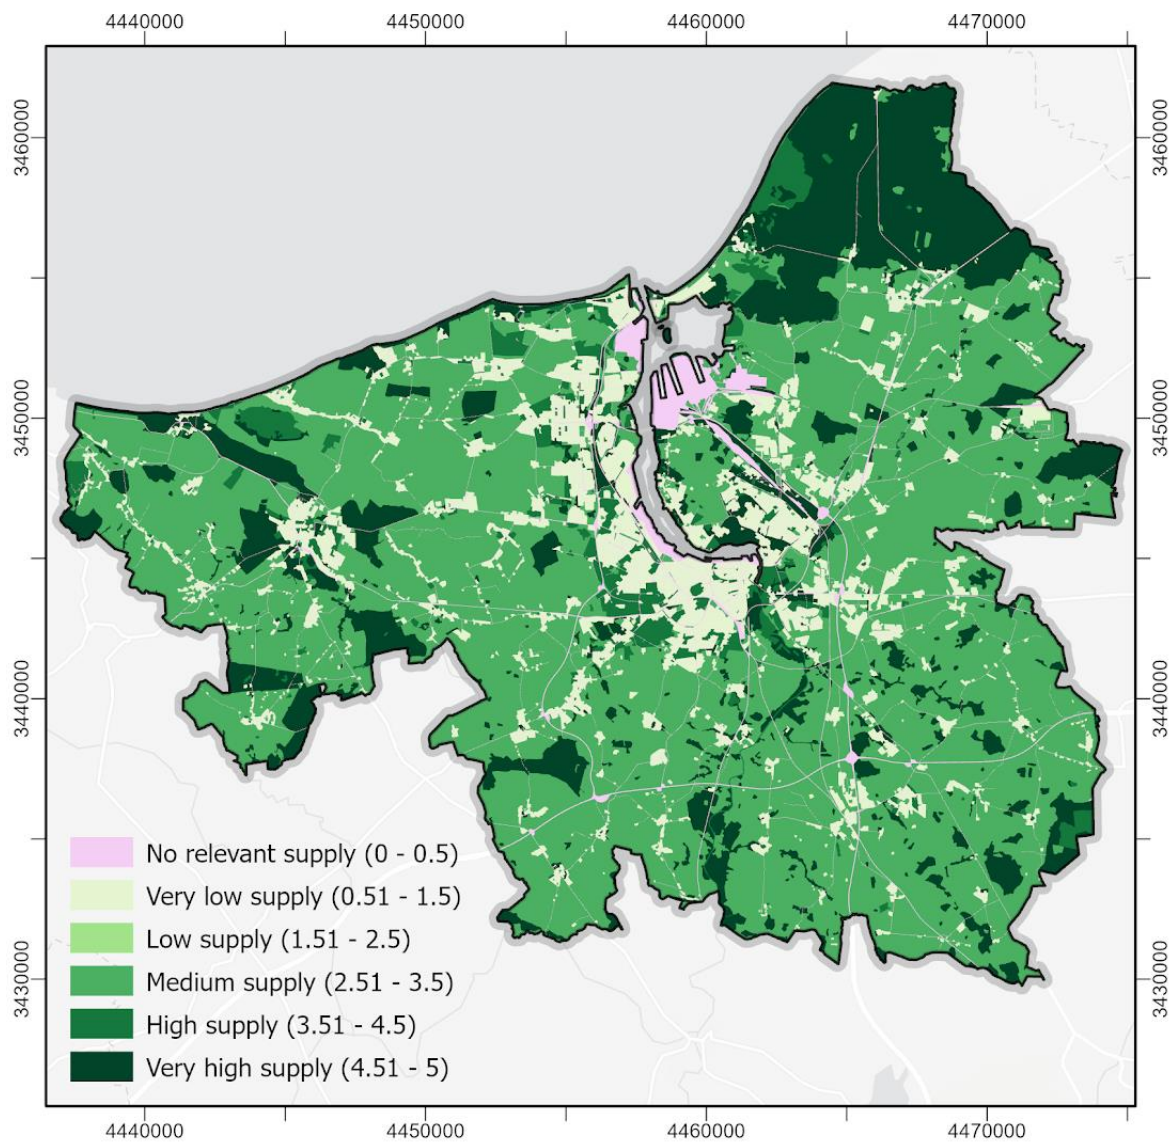

Data: Expert-based ES supply assessment, n=15; Urban Atlas © EEA 2016; © EuroGeographics for the administrative boundaries (2020).

Basemap: Esri, HERE, Garmin, FAO, METI/NASA, USGS.

Figure S6. Expert estimates of ES supply of flood and coastal protection. Urban region of Rostock.

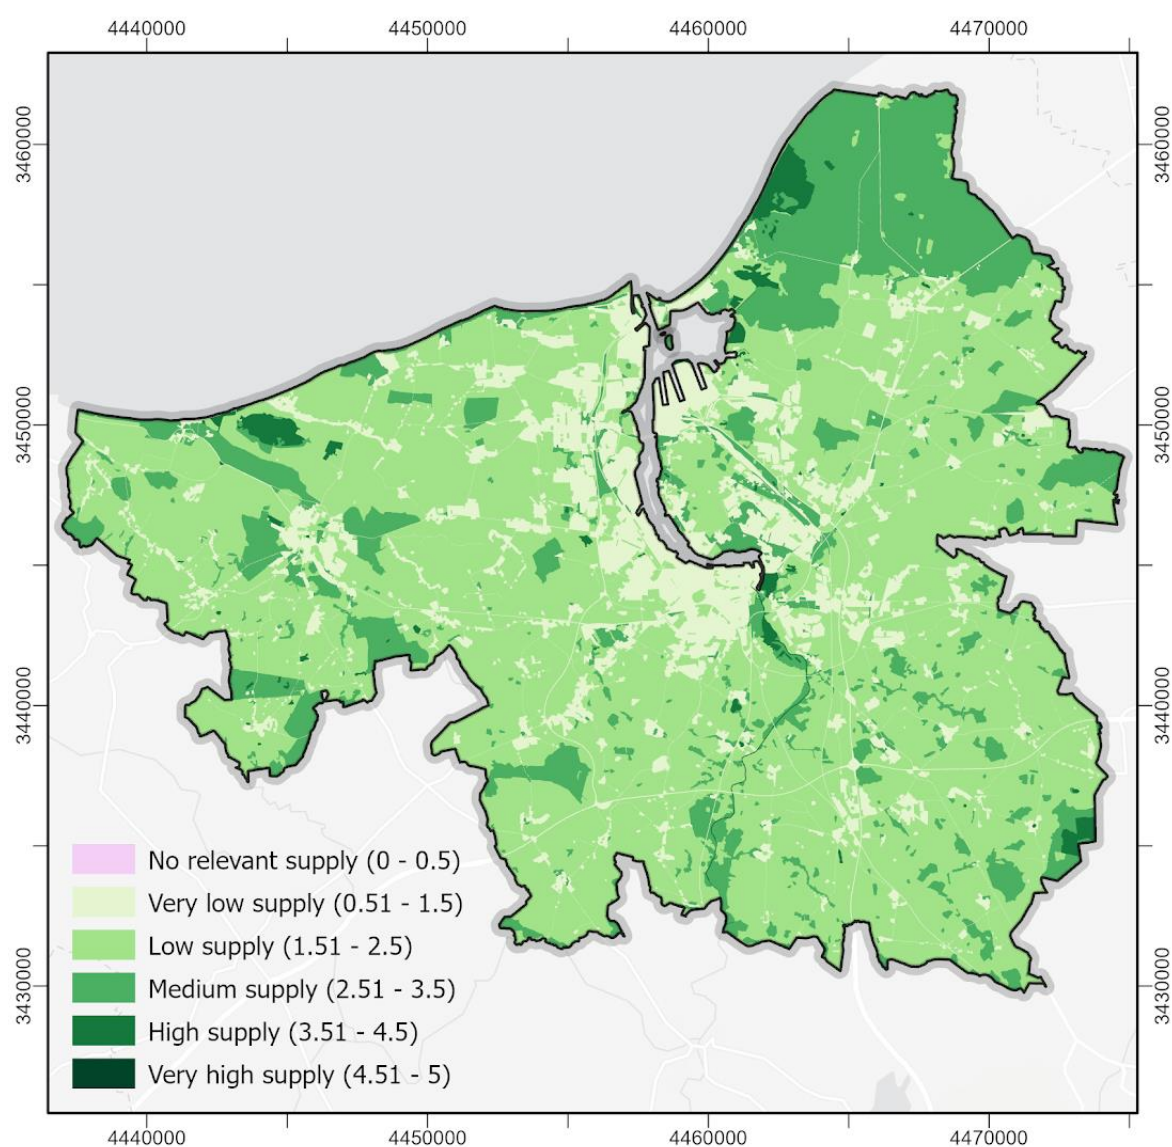

Data: Expert-based ES supply assessment, n=15; Urban Atlas © EEA 2016; © EuroGeographics for the administrative boundaries (2020).

Basemap: Esri, HERE, Garmin, FAO, METI/NASA, USGS.

Figure S7. Expert estimates of ES supply of food (from cultivated terrestrial plants). Urban region of Munich

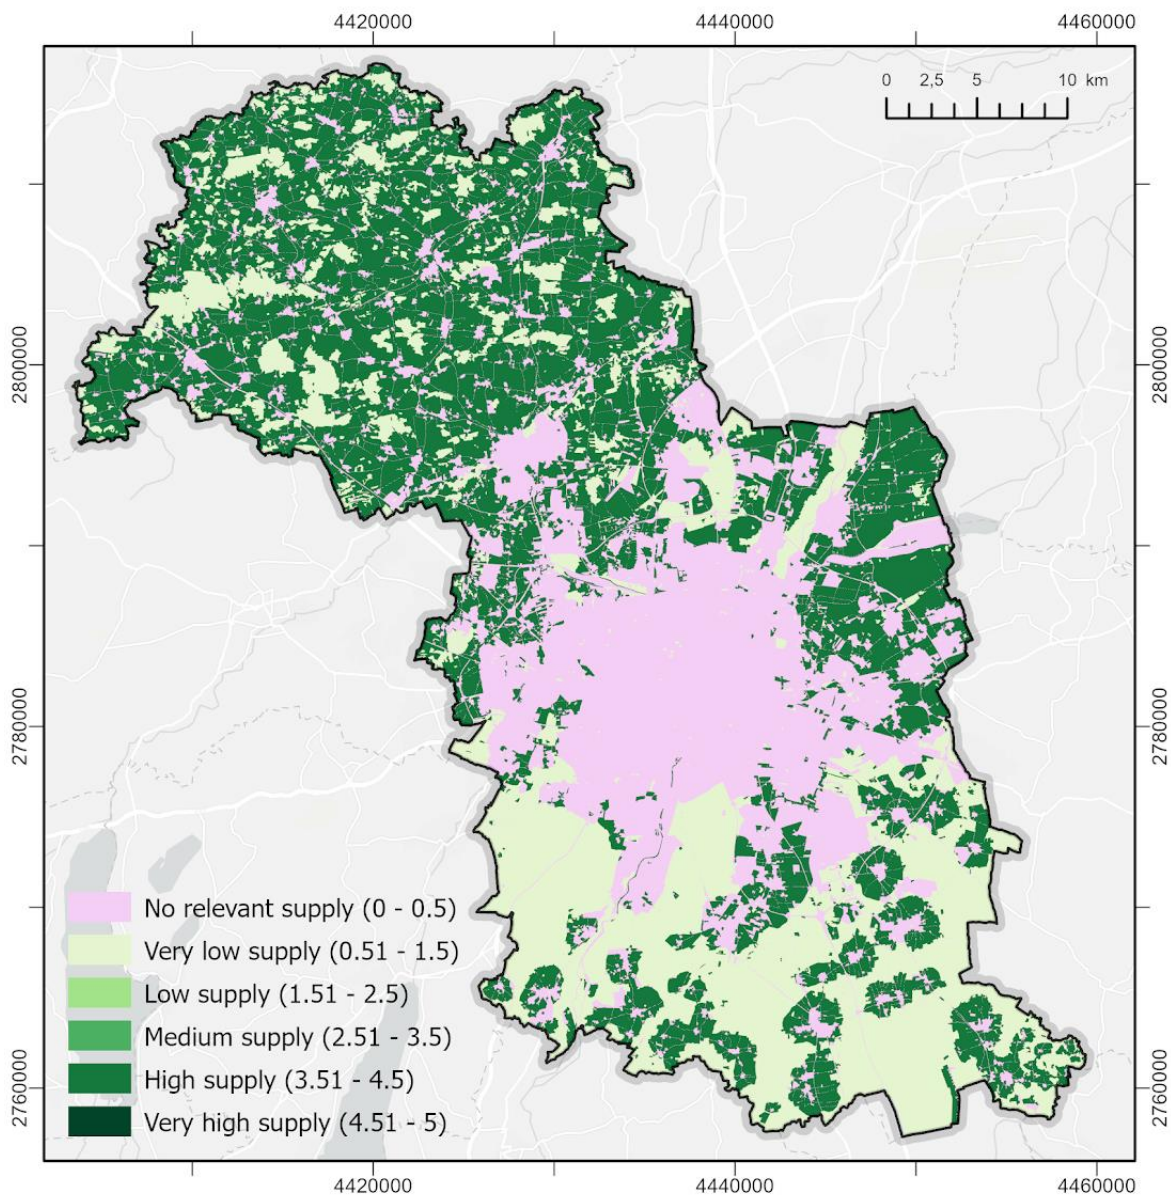

Data: Expert-based ES supply assessment, n=12; Urban Atlas © EEA 2016; © EuroGeographics for the administrative boundaries (2020).

Basemap: Esri, HERE, Garmin, FAO, METI/NASA, USGS.

Figure S8. Expert estimates of ES supply of raw materials (from cultivated terrestrial plants). Urban region of Munich.

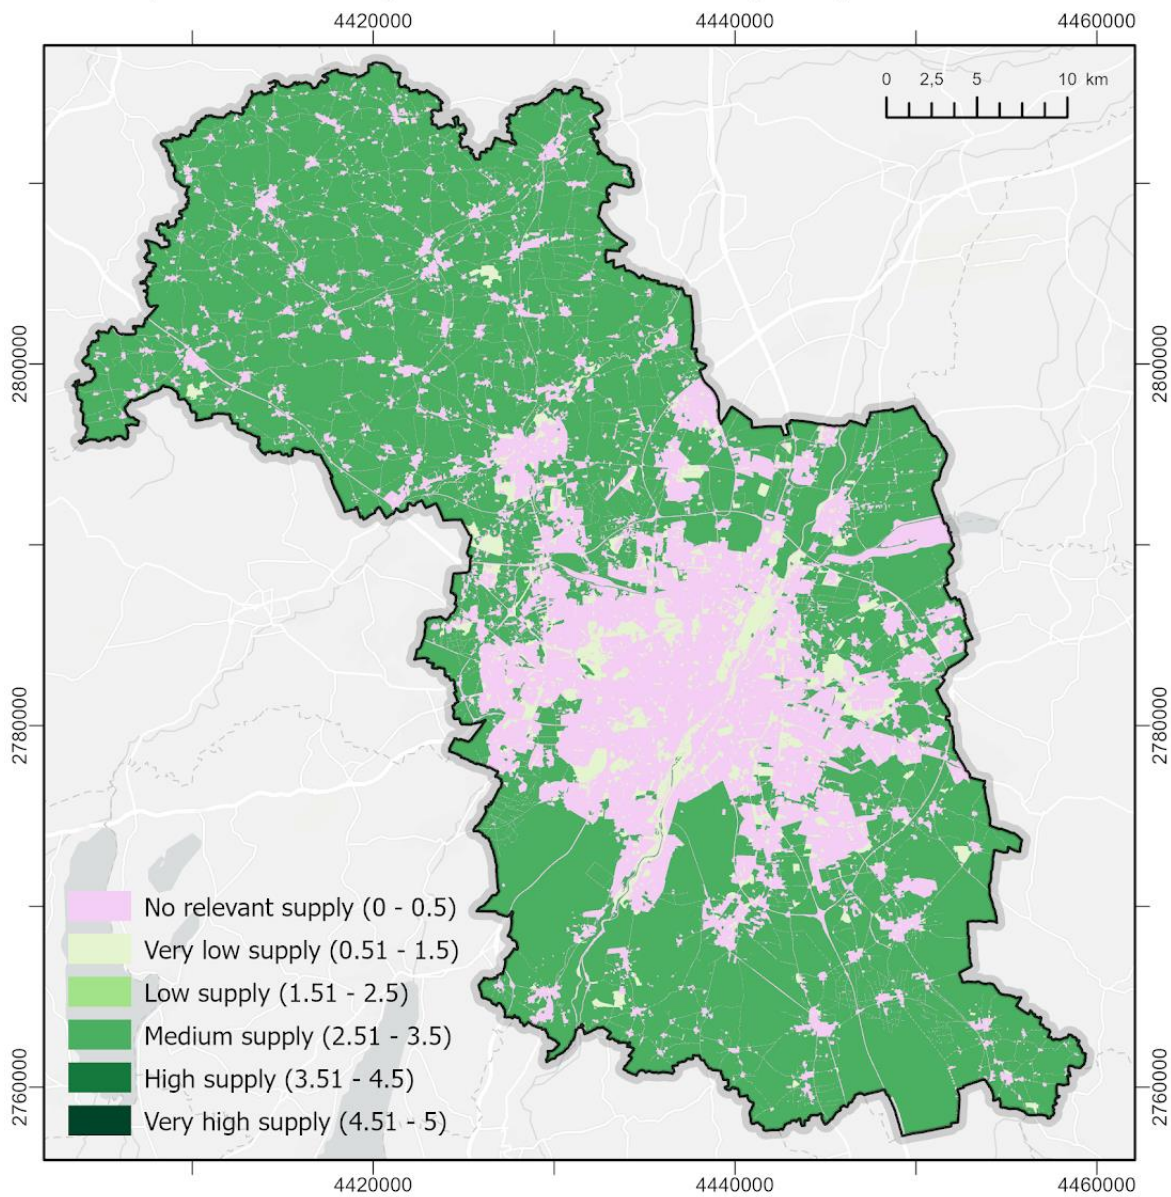

Data: Expert-based ES supply assessment, n=12; Urban Atlas © EEA 2016; © EuroGeographics for the administrative boundaries (2020).

Basemap: Esri, HERE, Garmin, FAO, METI/NASA, USGS.

Figure S9. Expert estimates of ES supply of pollination. Urban region of Munich.

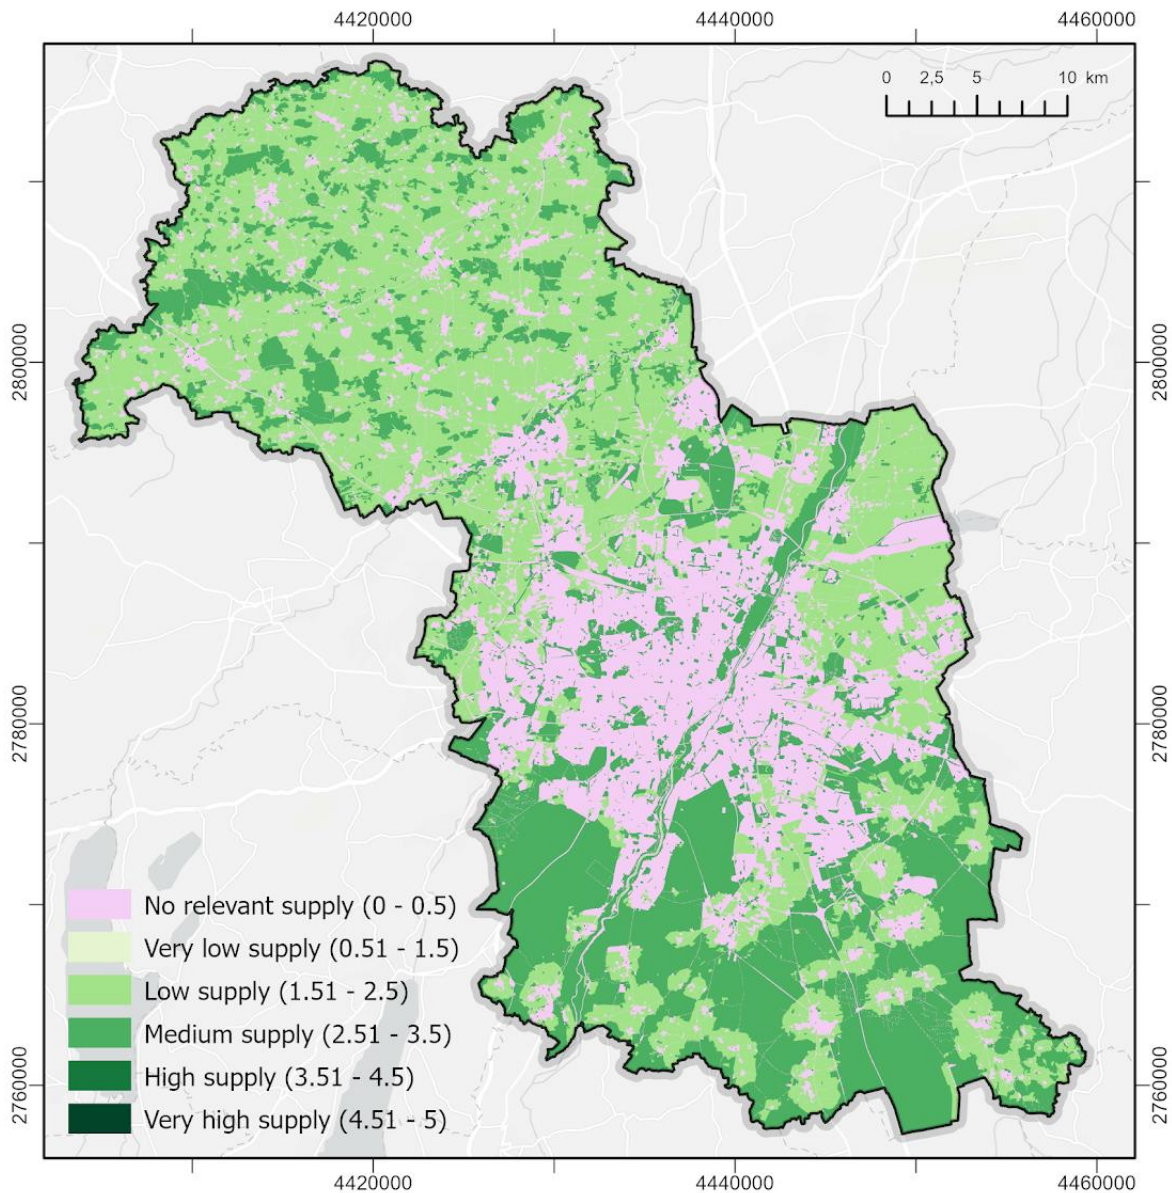

Data: Expert-based ES supply assessment, n=12; Urban Atlas © EEA 2016; © EuroGeographics for the administrative boundaries (2020).

Basemap: Esri, HERE, Garmin, FAO, METI/NASA, USGS.

Figure S10. Expert estimates of local climate regulation. Urban region of Munich.

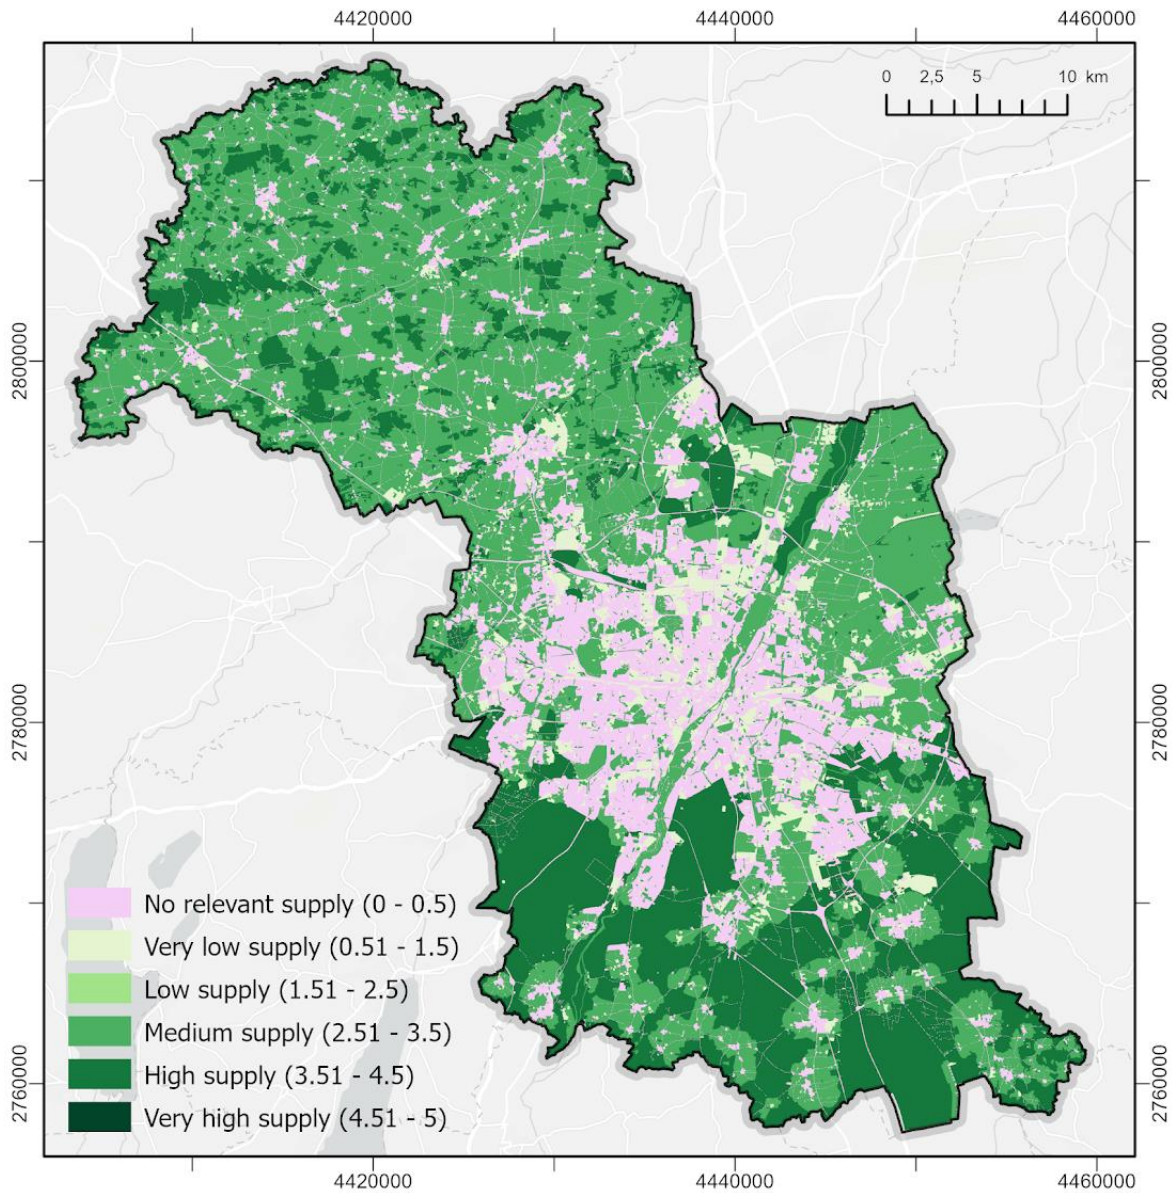

Data: Expert-based ES supply assessment, n=12; Urban Atlas © EEA 2016; © EuroGeographics for the administrative boundaries (2020).

Basemap: Esri, HERE, Garmin, FAO, METI/NASA, USGS.

Figure S11. Food (from cultivated terrestrial plants). Indicator: Agricultural area (%). Urban region of Rostock.

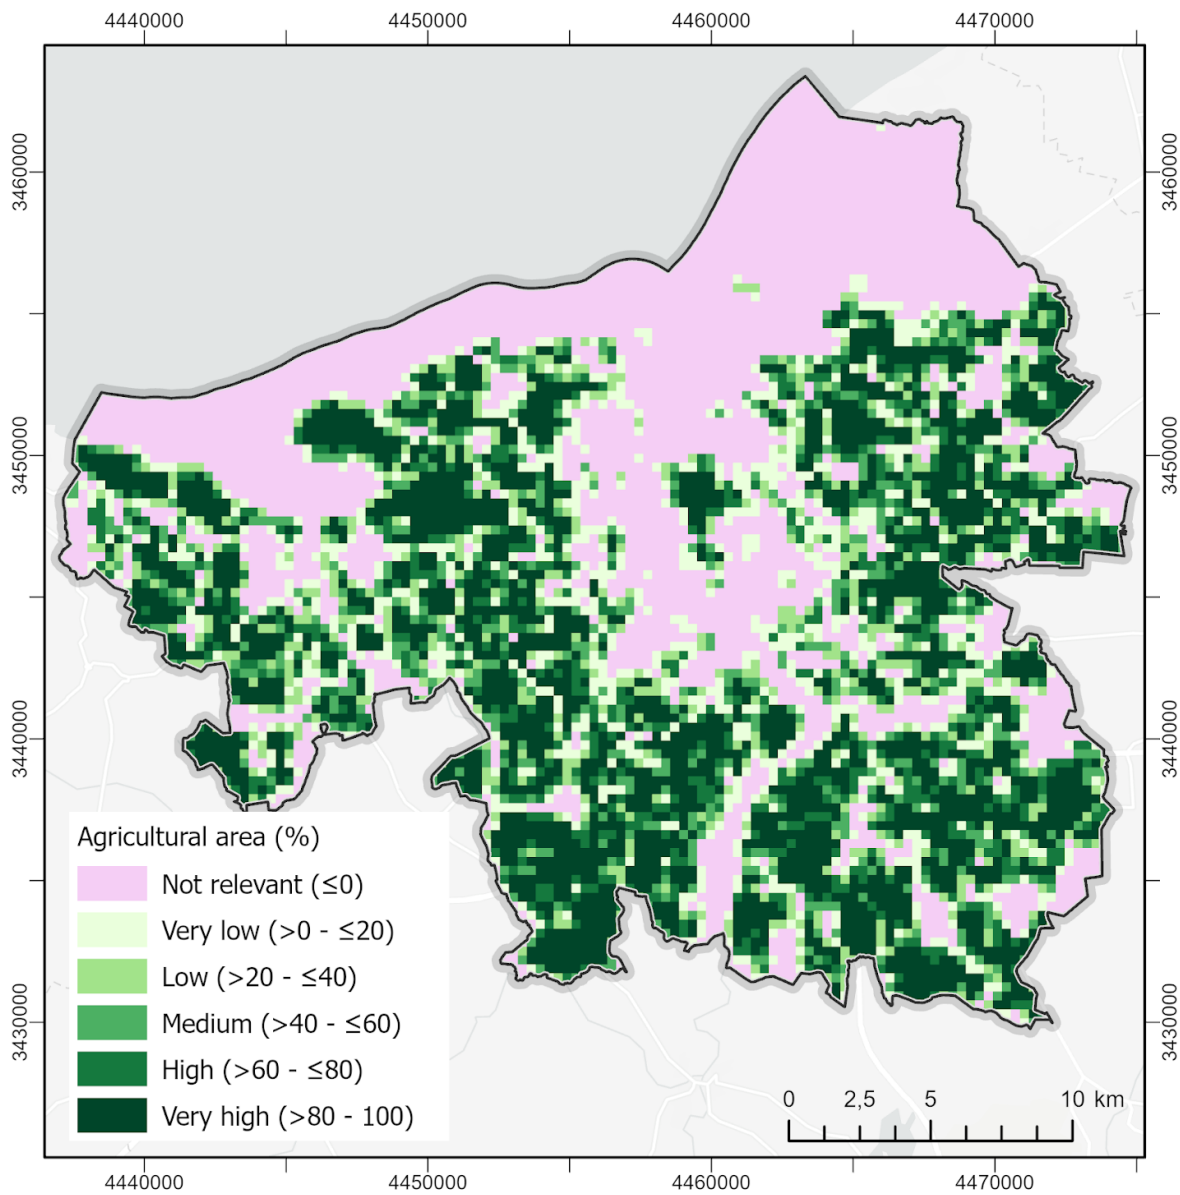

Data: Urban Atlas © EEA 2016: © EuroGeographics for the administrative boundaries (2020).

Basemap: ESRI. HERE. Garmin. FAO. METI/NASA. USGS

Figure S12. Food (from cultivated terrestrial plants). Indicator: Population density (Inhabitants  $\text{ha}^{-1}$ ). Urban region of Rostock.

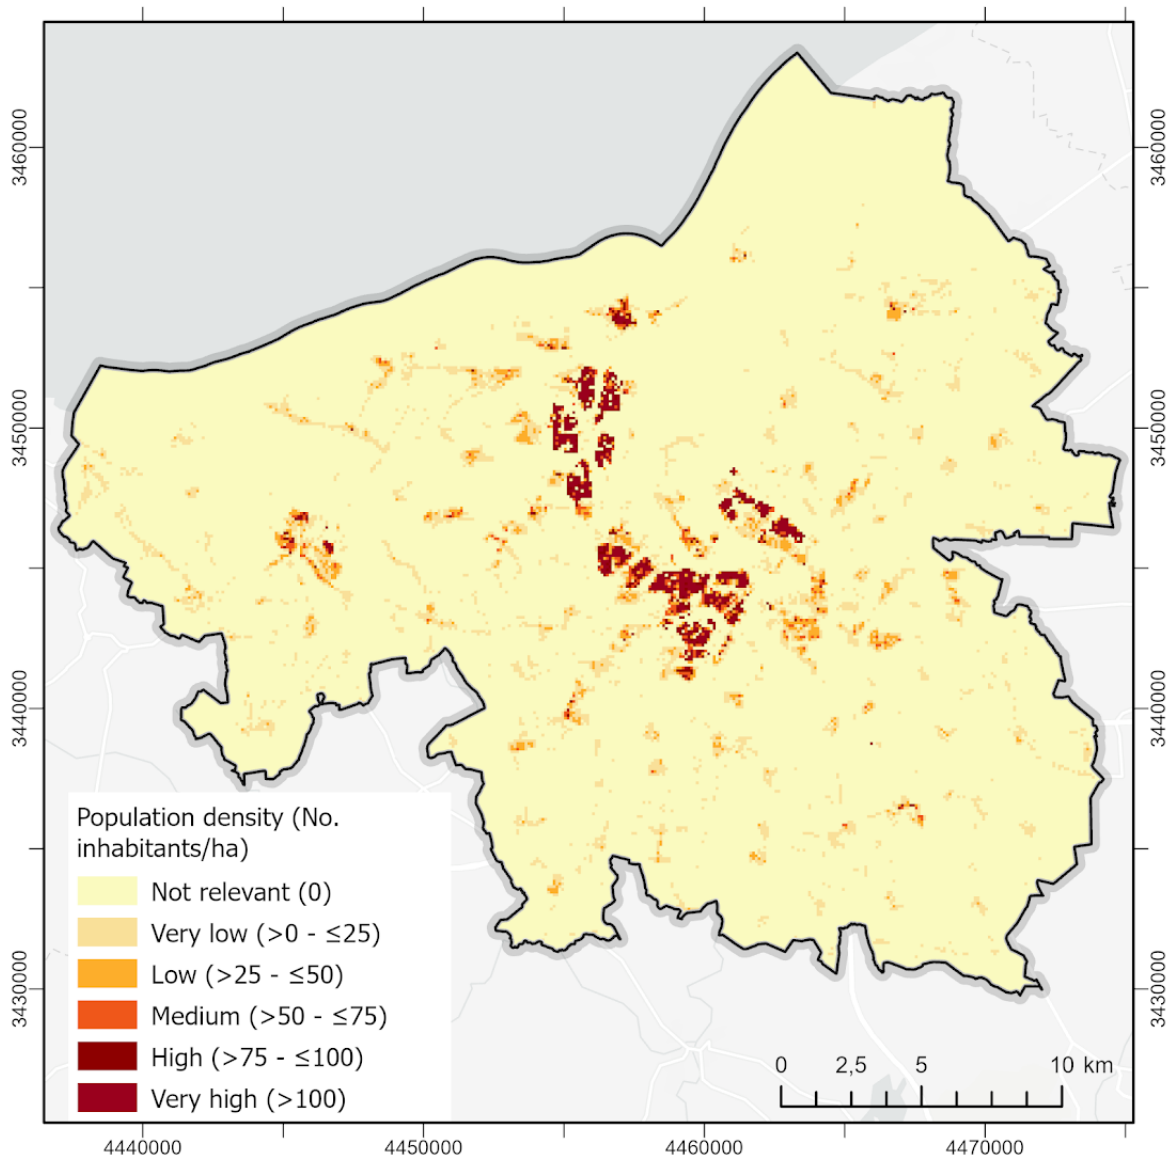

Data: Population density: Statistisches Bundesamt (2015); BKG 2020; © EuroGeographics for the administrative boundaries (2020).

Basemap: Esri, HERE, Garmin, FAO, METI/NASA, USGS.

Figure S13. Pollination. Indicator: Pollinator Abundance (Index 0 to 1). Urban region of Rostock.

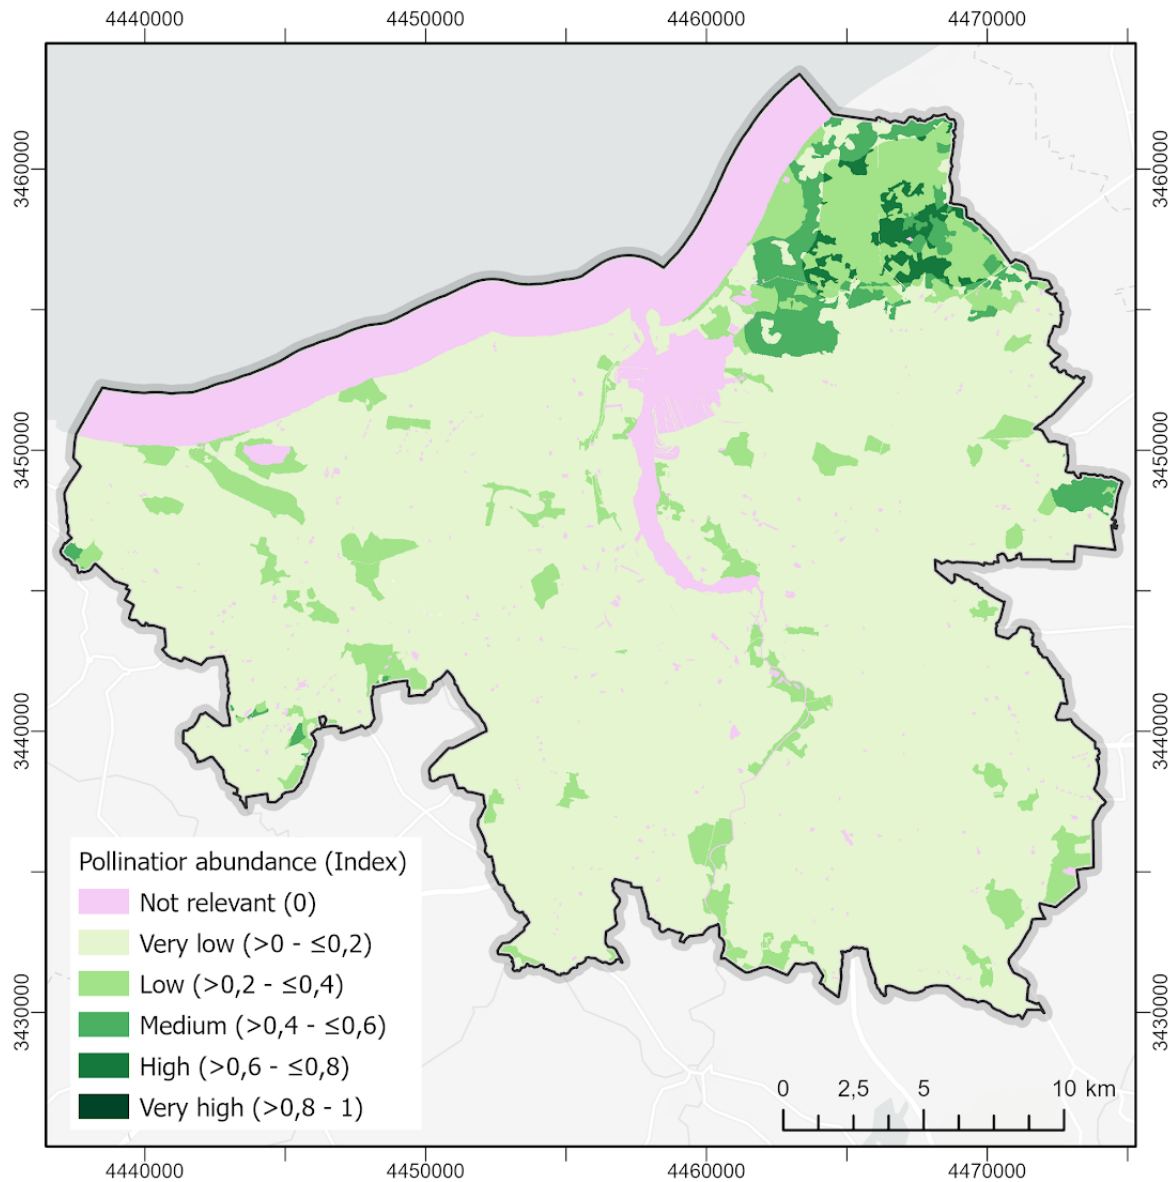

Data: Urban Atlas © EEA 2016; Corine Land Cover © EEA 2019; © EuroGeographics for the administrative boundaries (2020).

Basemap: Esri, HERE, Garmin, FAO, METI/NASA, USGS.

Figure S14. Pollination. Indicator: Pollinator Abundance (Index 0 to 1). Urban region of Munich.

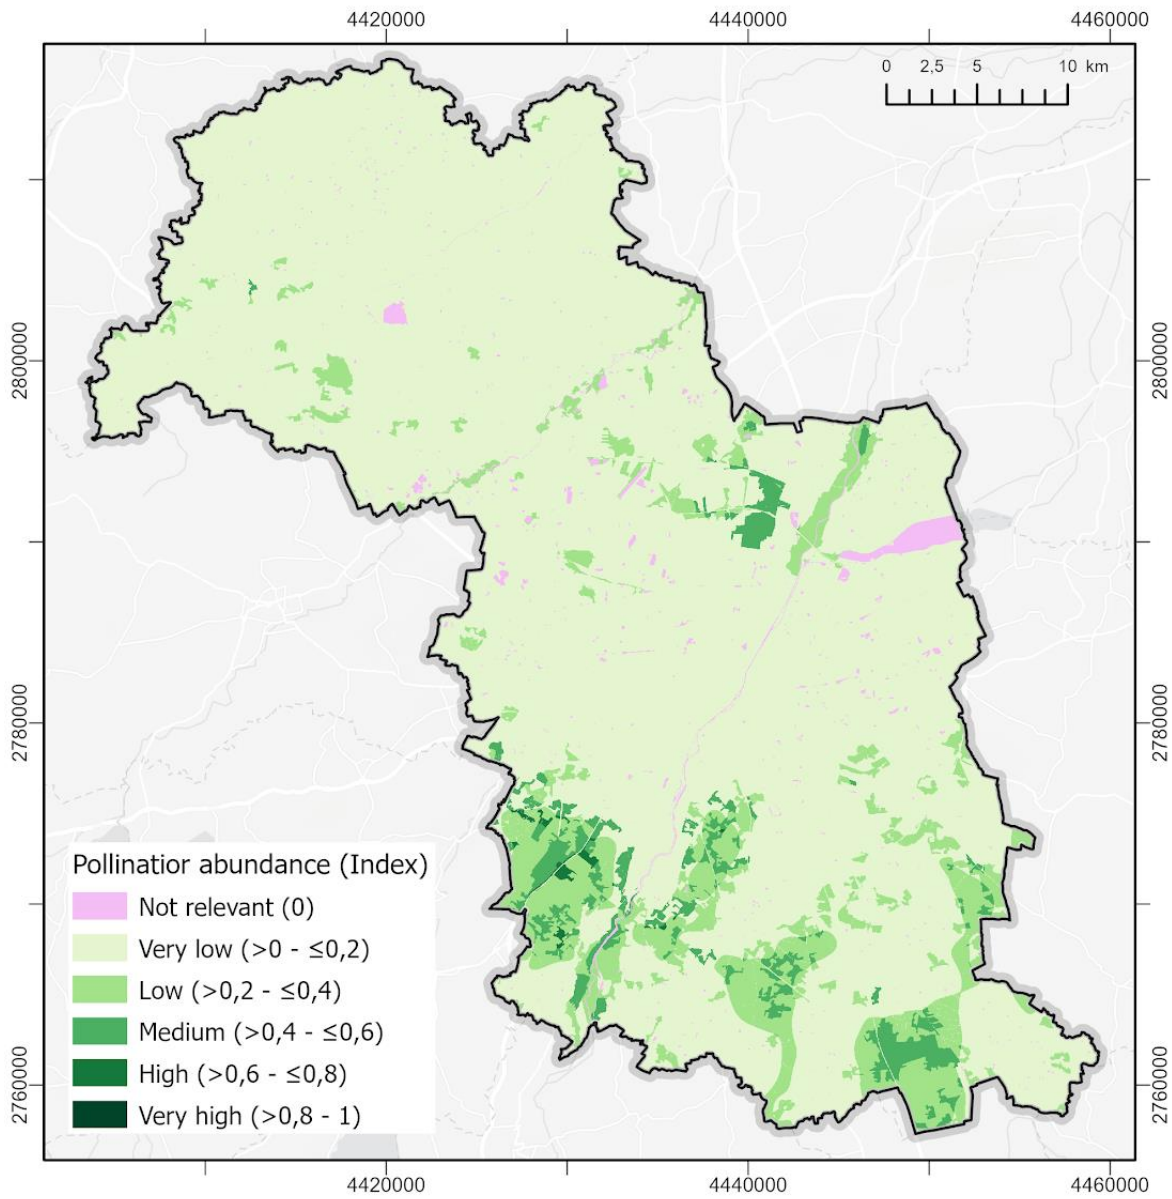

Data: Urban Atlas © EEA 2016; Corine Land Cover © EEA 2019; EuroGeographics for the administrative boundaries (2020).

Basemap: Esri, HERE, Garmin, FAO, METI/NASA, USGS.

Figure S15. Coastal protection. Indicator: Human health at risk of coastal flooding. Urban region of Rostock.

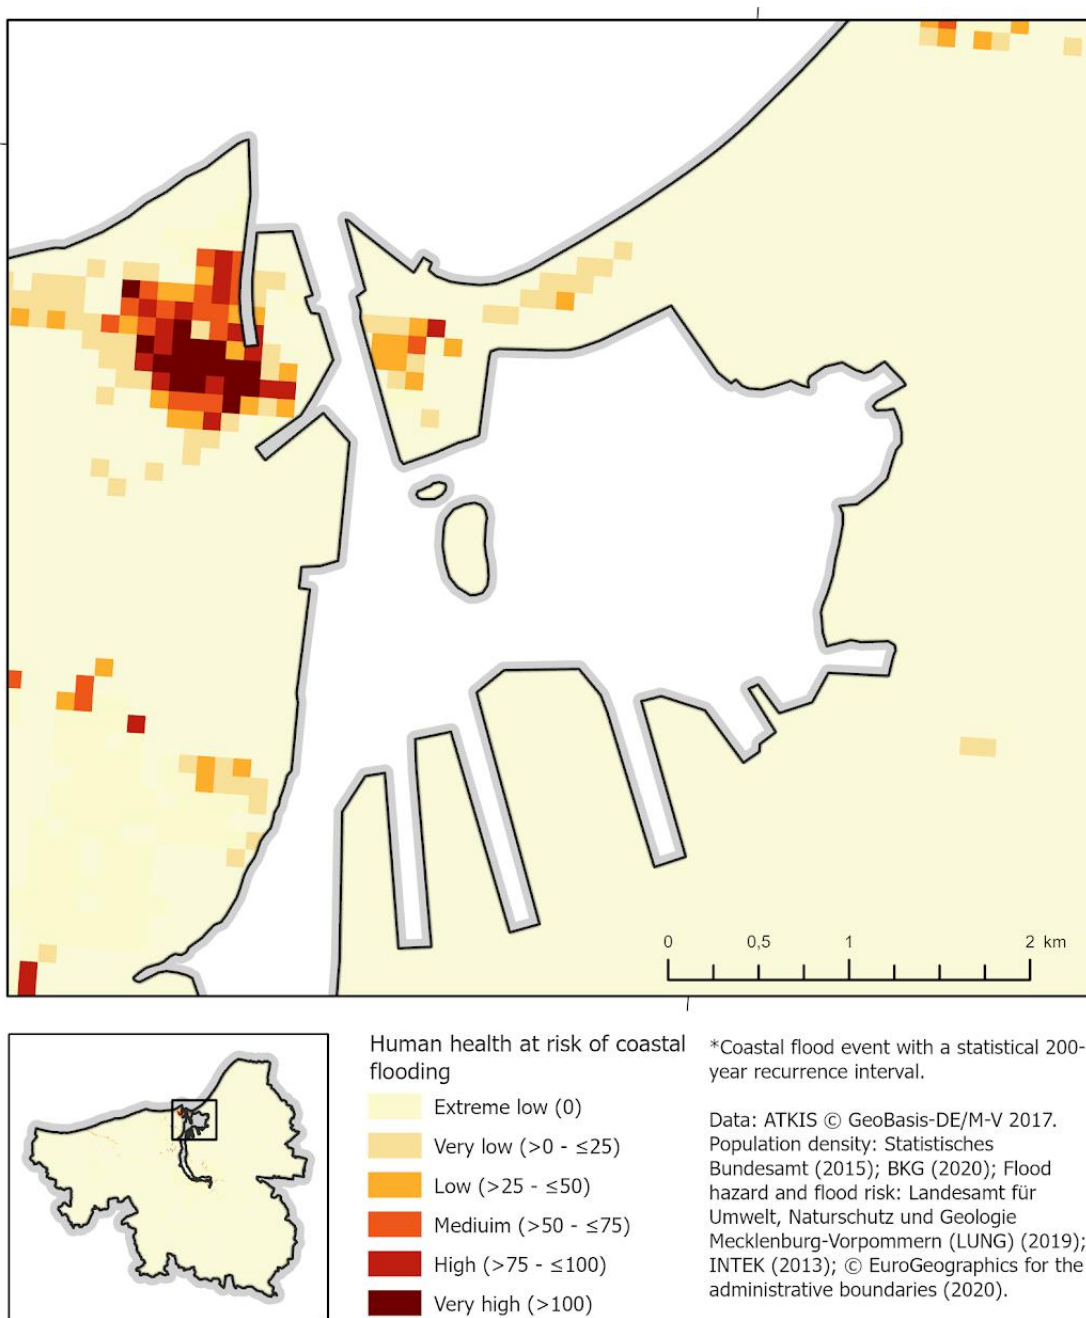

Figure S16. Coastal protection. Indicator: Infrastructure at risk of coastal flooding. Urban region of Rostock.

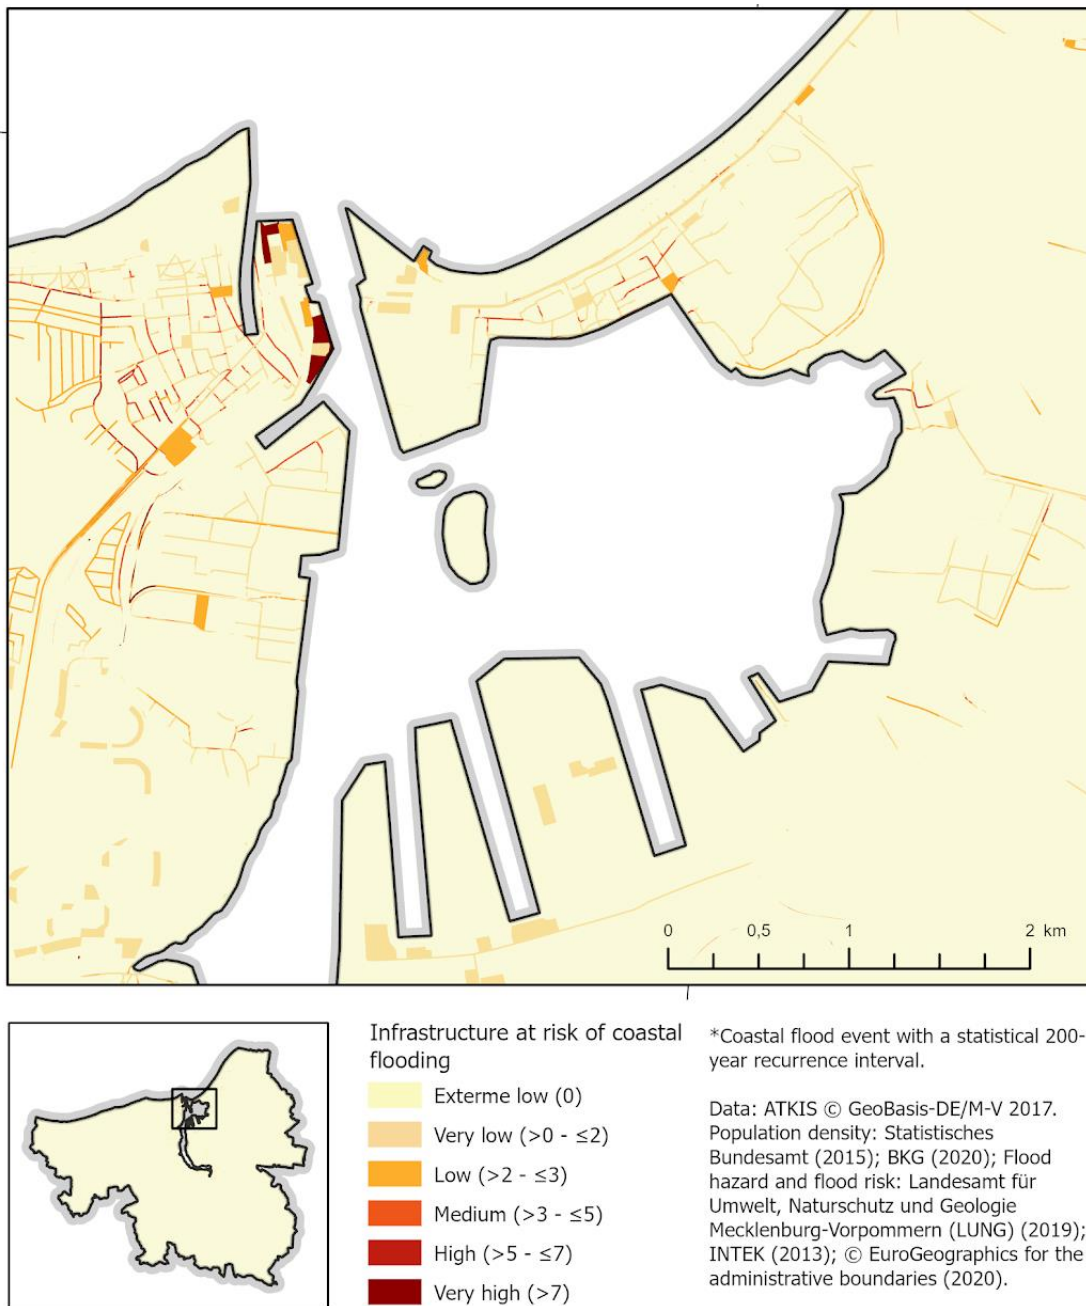

Figure S17. Coastal protection. Indicator: Environment (biotopes) at risk of coastal flooding. Urban region of Rostock.

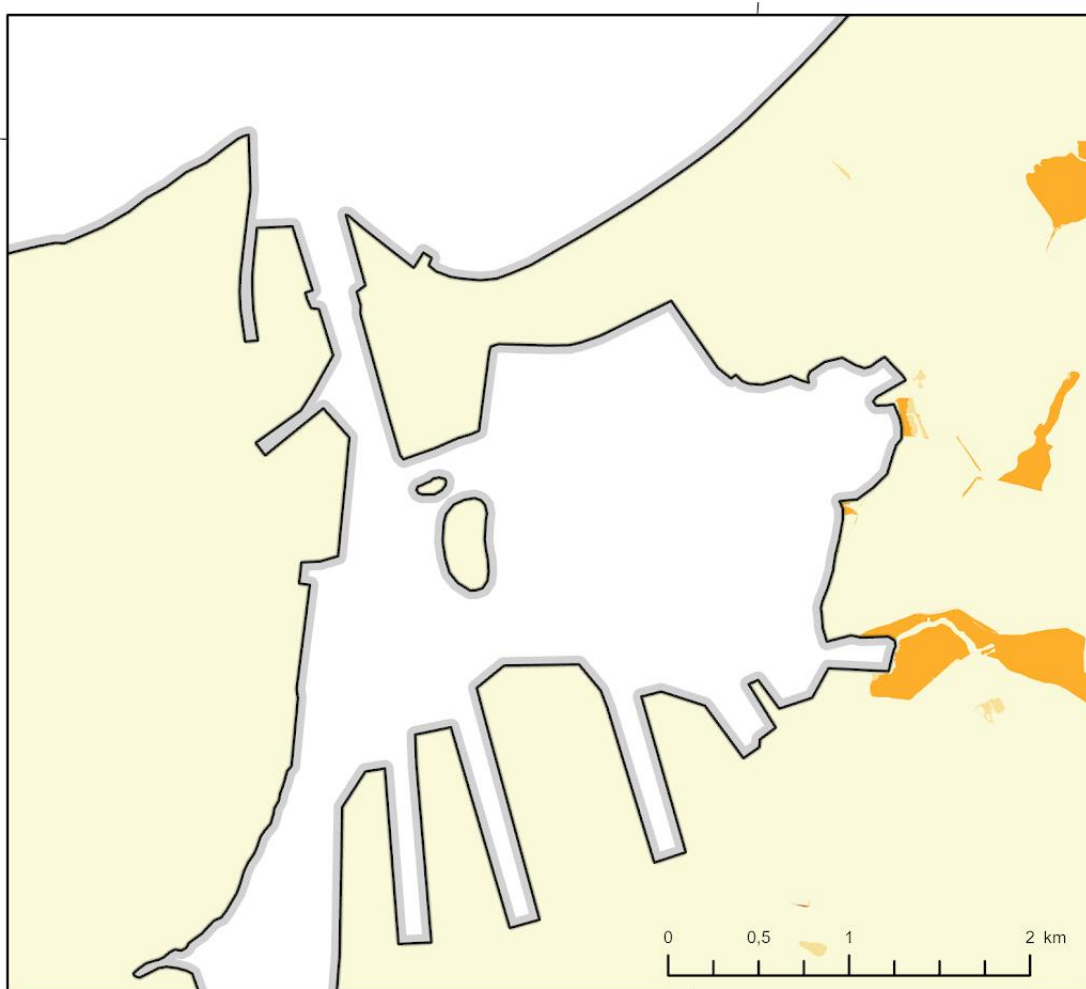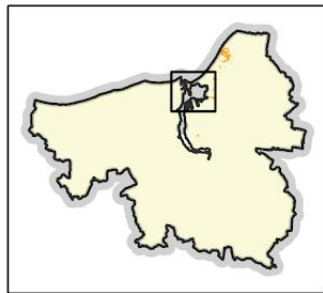

Environment (biotops) at risk of coastal flooding

- Extrem low (0)
- Very low ( $>0 - \leq 2$ )
- Low ( $>2 - \leq 3$ )
- Medium ( $>3 - \leq 5$ )
- High ( $>5 - \leq 7$ )
- Very high ( $>7$ )

\*Coastal flood event with a statistical 200-year recurrence interval.

Data: ATKIS © GeoBasis-DE/M-V 2017.  
Population density: Statistisches Bundesamt (2015); BKG (2020); Flood hazard and flood risk: Landesamt für Umwelt, Naturschutz und Geologie Mecklenburg-Vorpommern (LUNG) (2019); INTEK (2013); © EuroGeographics for the administrative boundaries (2020).

Figure S18. Coastal protection. Indicator: Human economic activities at risk of coastal flooding. Urban region of Rostock.

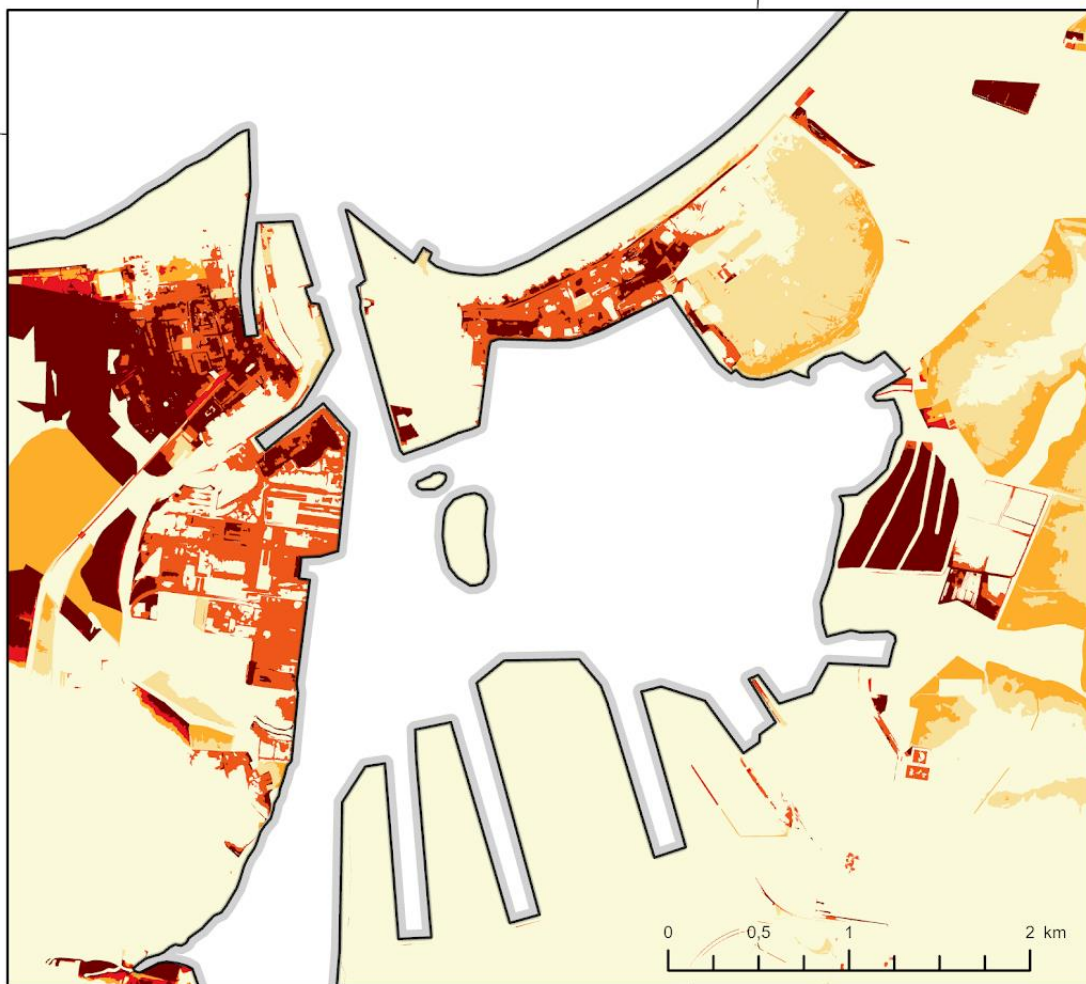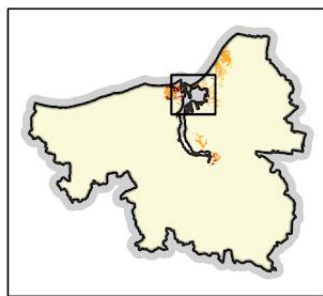

Human economic activities at risk of coastal flooding

- Extremely low (0)
- Very low ( $>0 - \leq 2$ )
- Low ( $>2 - \leq 3$ )
- Medium ( $>3 - \leq 5$ )
- High ( $>5 - \leq 7$ )
- Very high ( $>7$ )

\*Coastal flood event with a statistical 200-year recurrence interval.

Data: ATKIS © GeoBasis-DE/M-V 2017.  
Population density: Statistisches Bundesamt (2015); BKG (2020); Flood hazard and flood risk: Landesamt für Umwelt, Naturschutz und Geologie Mecklenburg-Vorpommern (LUNG) (2019); INTEK (2013); © EuroGeographics for the administrative boundaries (2020).

Figure S19: Local climate regulation. Indicator: Green and blue area (%). Urban region of Munich.

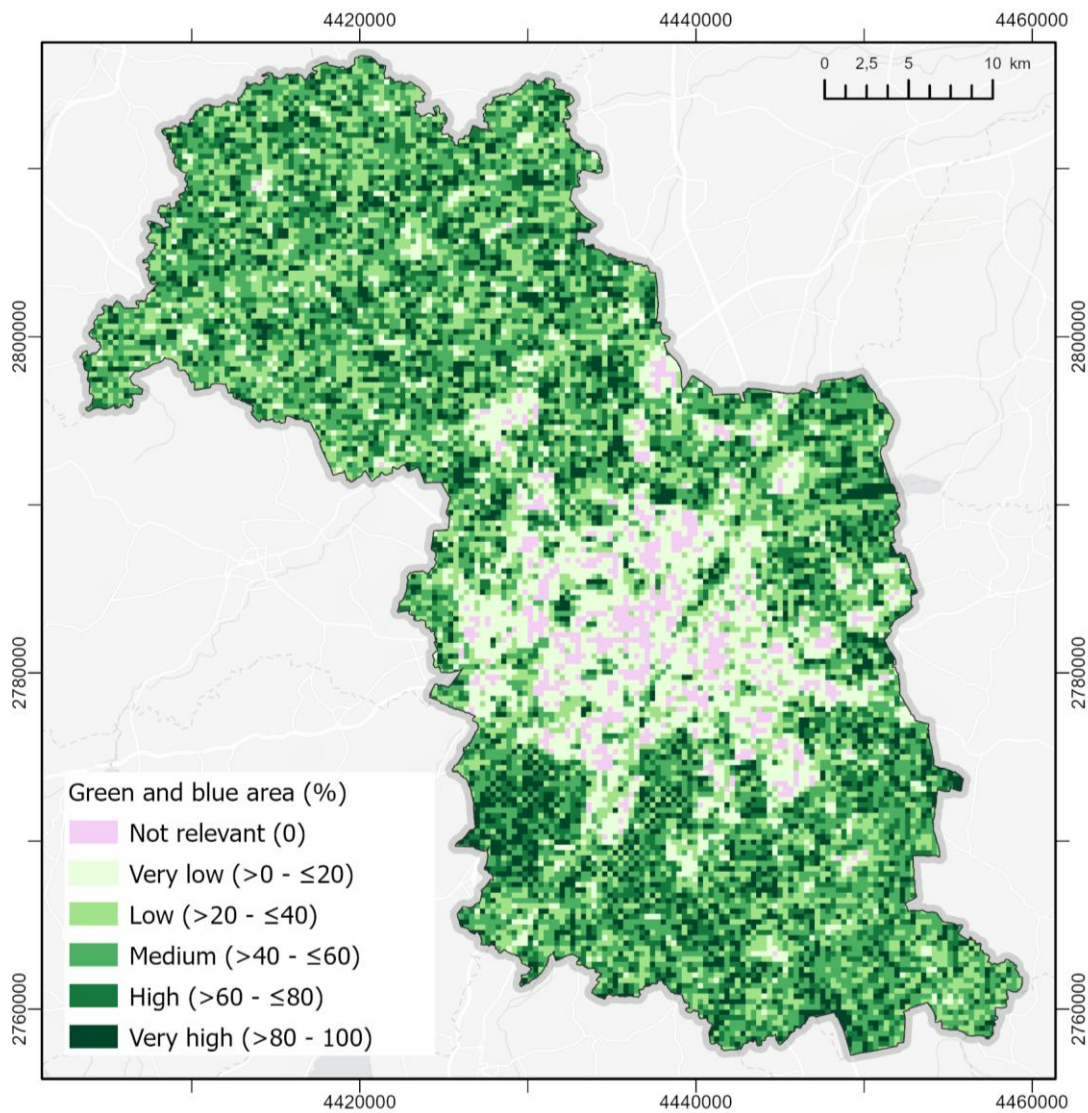

Data: Urban Atlas © EEA 2016; © EuroGeographics for the administrative boundaries (2020).

Basemap: ESRI. HERE. Garmin. FAO. METI/NASA. USGS

Figure S20. Local climate regulation. Indicator:  $f$ -evapotranspiration ( $f$ -ETP) (Index 0 to 1). Urban region of Munich.

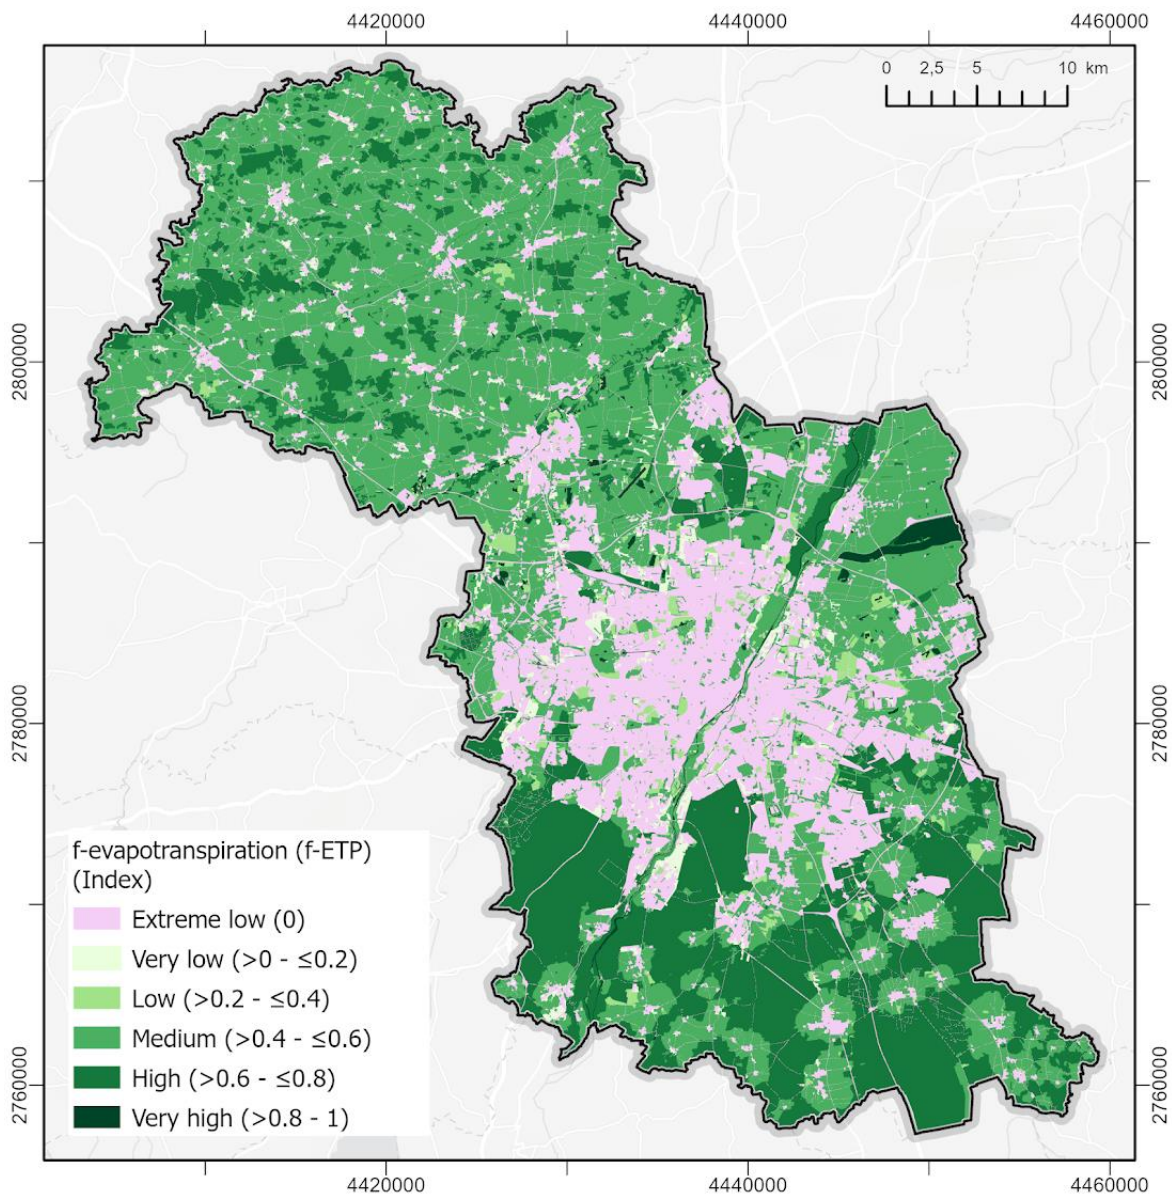

Data: Urban Atlas © EEA 2016; Corine Land Cover © EEA 2019; EuroGeographics for the administrative boundaries (2020).

Basemap: Esri, HERE, Garmin, FAO, METI/NASA, USGS.

Figure S21. Local climate regulation. Indicator: Heat mitigation (Index 0 to 1). Urban region of Munich.

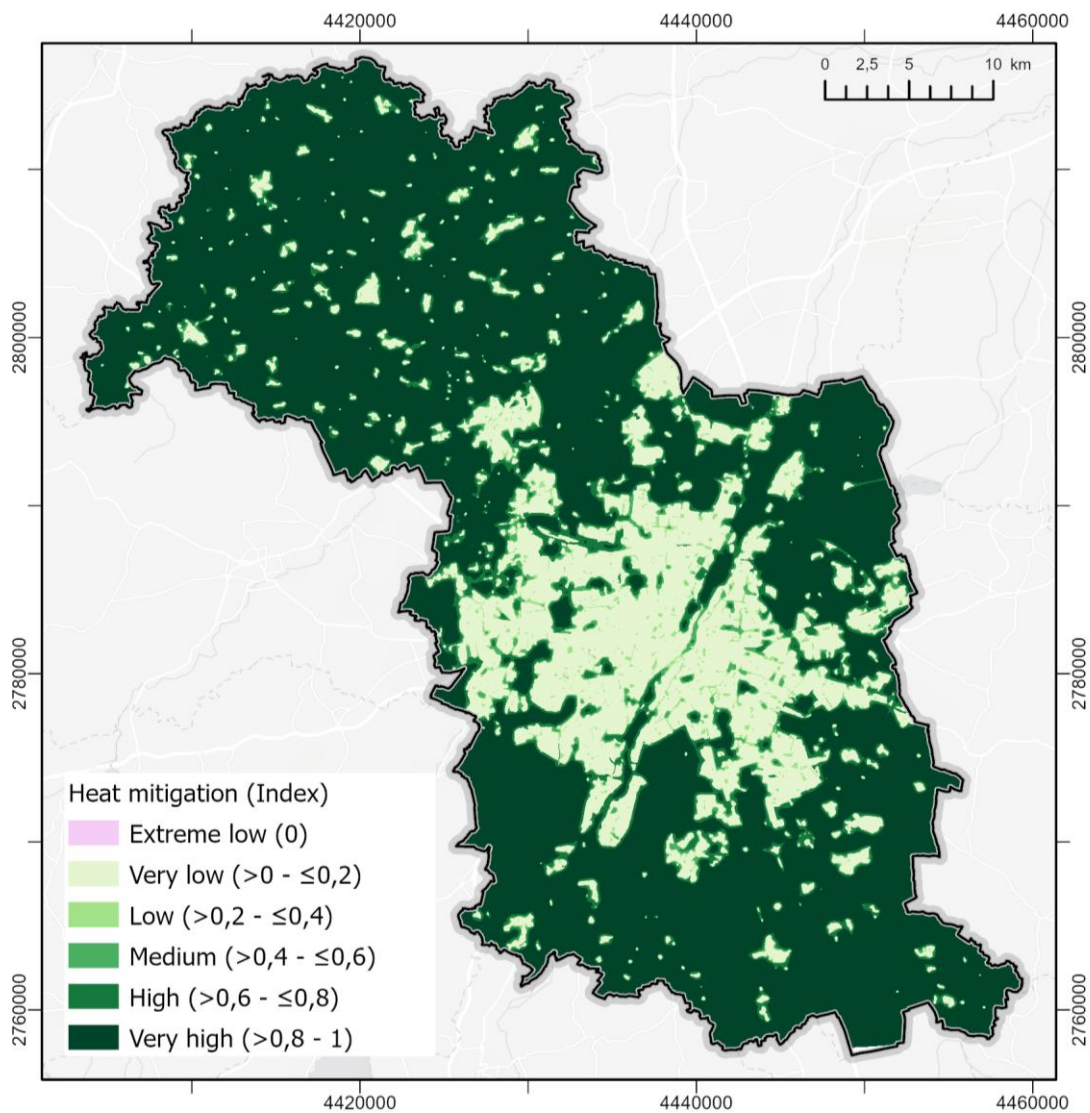

Data: Urban Atlas © EEA 2016; Corine Land Cover © CDC 2018a; © CDC 2019; © CDC 2020; Yale University 2019; Nistor 2016; Stewart and Oke 2012; © EuroGeographics for the administrative boundaries (2020).

Basemap: Esri, HERE, Garmin, FAO, METI/NASA, USGS.
